# Supplementary material for: Comorbidity and outcomes in traumatic brain injury: protocol for a systematic review on functional status and risk of death
Source: PubMed Central journal article supplement (PMC5652528; doi:10.1136/bmjopen-2017-018626), 2017-10-13
Supplement: bmjopen-2017-018626.draft_revisions.pdf [file bmjopen-2017-018626.draft_revisions.pdf]

# BMJ Open

BMJ Open is committed to open peer review. As part of this commitment we make the peer review history of every article we publish publicly available.

When an article is published we post the peer reviewers' comments and the authors' responses online. We also post the versions of the paper that were used during peer review. These are the versions that the peer review comments apply to.

The versions of the paper that follow are the versions that were submitted during the peer review process. They are not the versions of record or the final published versions. They should not be cited or distributed as the published version of this manuscript.

BMJ Open is an open access journal and the full, final, typeset and author-corrected version of record of the manuscript is available on our site with no access controls, subscription charges or pay-per-view fees (<http://bmjopen.bmj.com>).

If you have any questions on BMJ Open's open peer review process please email [editorial.bmjopen@bmj.com](mailto:editorial.bmjopen@bmj.com)

# BMJ Open

## Comorbidity and outcomes in traumatic brain injury: Protocol for a systematic review on functional status and risk of death.

|                                 |                                                                                                                                                                                                                                                                                                                                                                                                                                                                                                                                                                                                                                                                                                          |
|---------------------------------|----------------------------------------------------------------------------------------------------------------------------------------------------------------------------------------------------------------------------------------------------------------------------------------------------------------------------------------------------------------------------------------------------------------------------------------------------------------------------------------------------------------------------------------------------------------------------------------------------------------------------------------------------------------------------------------------------------|
| Journal:                        | <i>BMJ Open</i>                                                                                                                                                                                                                                                                                                                                                                                                                                                                                                                                                                                                                                                                                          |
| Manuscript ID                   | bmjopen-2017-018626                                                                                                                                                                                                                                                                                                                                                                                                                                                                                                                                                                                                                                                                                      |
| Article Type:                   | Protocol                                                                                                                                                                                                                                                                                                                                                                                                                                                                                                                                                                                                                                                                                                 |
| Date Submitted by the Author:   | 10-Jul-2017                                                                                                                                                                                                                                                                                                                                                                                                                                                                                                                                                                                                                                                                                              |
| Complete List of Authors:       | Mollayeva , Tatyana; Toronto Rehabilitation Institute, Research; University of Toronto, Rehabilitation Sciences Institute<br>Xiong, Chen; Rehabilitation Sciences Institute , University of Toronto<br>Hanafy, Sara; Toronto Rehabilitation Institute-University Health Network, Research<br>Chan , Vincy ; Toronto Rehabilitation Institute , Research<br>Hu, Zheng Jing ; Toronto Rehabilitation Institute-University Health Network, Research<br>Sutton, Mitchell; Toronto Rehabilitation Institute-University Health Network, Research<br>Escobar, Michael ; University of Toronto Dalla Lana School of Public Health<br>Colantonio, Angela; University of Toronto, Rehabilitation Science Institute |
| <b>Primary Subject Heading</b>: | Epidemiology                                                                                                                                                                                                                                                                                                                                                                                                                                                                                                                                                                                                                                                                                             |
| Secondary Subject Heading:      | Research methods, Neurology                                                                                                                                                                                                                                                                                                                                                                                                                                                                                                                                                                                                                                                                              |
| Keywords:                       | comorbidity, traumatic brain injury, prognostic review, mortality, cognitive/physical status, sex and age stratification                                                                                                                                                                                                                                                                                                                                                                                                                                                                                                                                                                                 |
|                                 |                                                                                                                                                                                                                                                                                                                                                                                                                                                                                                                                                                                                                                                                                                          |

SCHOLARONE™  
Manuscripts

1  
2  
3 **TITLE:** Comorbidity and outcomes in traumatic brain injury: Protocol for a systematic review  
4  
5 on functional status and risk of death.  
6

7  
8 **Authors:** Tatyana Mollayeva, MD, PhD<sup>1-3</sup>, Chen Xiong, MSc<sup>1-3</sup>, Sara Hanafy, MSc<sup>2,3</sup>, Vincy  
9  
10 Chan, MPH, PhD<sup>2-4</sup>, Zheng Jing Hu, MSc<sup>5</sup>, Mitchell Sutton, MSc<sup>5</sup>, Michael Escobar, PhD<sup>5</sup>,  
11  
12 Angela Colantonio, PhD<sup>1-3,5</sup>  
13

14  
15 **Author details**

16  
17 <sup>1</sup>Rehabilitation Sciences Institute, Faculty of Medicine, University of Toronto, Canada

18  
19 <sup>2</sup>Toronto Rehabilitation Institute-University Health Network, Canada

20  
21 <sup>3</sup>Acquired Brain Injury Research Lab, University of Toronto, Canada

22  
23 <sup>4</sup>Pediatric Oncology Group of Ontario, Canada

24  
25 <sup>5</sup>Dalla Lana School of Public Health, University of Toronto  
26  
27

28  
29  
30  
31  
32 **Tatyana Mollayeva, MD, PhD (corresponding author)**

33  
34 Rehabilitation Sciences Institute

35  
36 University of Toronto

37  
38 Toronto Rehabilitation Institute-University Health Network

39  
40 550 University Avenue, Rm 11207

41  
42 Toronto, Ontario M5G 2A2

43  
44 tatyana.mollayeva@utoronto.ca

45  
46 tel: 416-597-3422 ext 7848

47  
48 fax: 416-946-8570  
49  
50  
51  
52  
53  
54

55  
56 **Chen Xiong, MSc, PhD student**  
57  
58  
59  
60

1  
2  
3 Rehabilitation Sciences Institute

4  
5 Rehabilitation Sciences Building, University of Toronto

6  
7 500 University Avenue, Room 260

8  
9 Toronto, ON M5G 1V7

10  
11 chen.xiong@mail.utoronto.ca

12  
13 tel: 647-770-8366

14  
15 fax: 416-946-8570

16  
17  
18  
19  
20  
21  
22 **Sara Hanafy, MSc**

23  
24 Researcher-volunteer

25  
26 Toronto Rehabilitation Institute-University Health Network

27  
28 550 University Avenue

29  
30 Toronto, ON M5G 2A2

31  
32 sara.hanafy@utoronto.ca

33  
34 tel: 416-597-3422

35  
36 fax: 416-946-8570

37  
38  
39  
40  
41  
42  
43 **Vincy Chan, PhD, MPH**

44  
45 Pediatric Oncology Group of Ontario, Canada

46  
47 Toronto Rehabilitation Institute-University Health Network

48  
49 550 University Avenue

50  
51 Toronto, ON, M5G 2A2

52  
53 vincy.chan@uhn.ca

1  
2  
3 416-597-3422 ext. 7845  
4  
5  
6  
7

8 **Zheng Jing Hu, MSc**  
9

10 Summer research intern  
11

12 Toronto Rehabilitation Institute-University Health Network  
13

14 550 University Avenue, Rm 11-207  
15

16 Toronto, Ontario M5G 2A2  
17

18 Dalla Lana School of Public Health  
19

20 University of Toronto  
21

22 Zhengjing.hu@mail.utoronto.ca  
23

24 tel: 416-597-3422  
25

26 fax: 416-946-8570  
27  
28  
29  
30  
31  
32  
33

34 **Mitchell Sutton, MSc**  
35

36 Summer research intern  
37

38 Toronto Rehabilitation Institute-University Health Network  
39

40 550 University Avenue, Rm 11-207  
41

42 Toronto, Ontario M5G 2A2  
43

44 Dalla Lana School of Public Health  
45

46 University of Toronto  
47

48 mitchell.sutton@mail.utoronto.ca  
49

50 tel: 416-597-3422  
51

52 fax: 416-946-8570  
53  
54  
55  
56  
57  
58  
59  
60

**Michael Escobar, PhD**

Professor, Dalla Lana School of Public Health

Health Sciences Building

155 College Street, 6th Floor

Toronto, ON M5T 3M7

m.escobar@utoronto.ca

tel: 416- 978-7942

fax: 416-946-8570

**Angela Colantonio, PhD**

Director, Rehabilitation Sciences Institute

University of Toronto

Senior Scientist, Toronto Rehabilitation Institute-University Health Network

160-500 University Ave.

Toronto, Ontario M5G 1V7

angela.colantonio@utoronto.ca

tel: 416-978-1098

fax: 416-946-8570

## ABSTRACT

**Introduction:** Reports on the association between comorbidity and functional status and risk of death in patients with traumatic brain injury (TBI) have been inconsistent; it is currently unknown which additional clinical entities (comorbidities) have an adverse influence on the evolution of outcomes across the lifespan of males and females with TBI. The current protocol outlines a strategy for a systematic review of the current evidence examining the impact of comorbidity on functional status and early and late-term mortality, taking into account known risk factors of these adverse outcomes (i.e., demographic (age and sex), and injury-related characteristics).

**Methods and analysis:** A comprehensive search strategy for TBI prognosis, functional (cognitive and physical) status and mortality studies has been developed in collaboration with a medical information specialist of the large rehabilitation teaching hospital. All peer-reviewed English language studies with longitudinal design in adults with TBI of any severity, published from May 1997 to April 2017, found through Medline, Central, Embase, Scopus, PsycINFO and bibliographies of identified articles, will be considered eligible. Study quality will be assessed using published guidelines.

**Ethics and dissemination:** The number of males and females of all ages surviving TBI progressively increases. While the neurological consequences of TBI are well described, evidence is emerging on associations between comorbid disorders and adverse short and long-term outcomes post-injury. The significant economic and human costs of TBI merit the call for systematic efforts to understand all factors that contribute to these adverse outcomes to inform risk stratification of patients to guide the management of brain injury acutely and at the chronic stages post-injury on a population level. *Registration details:* CRD42017070033.

1  
2  
3  
4  
5 **Keywords:** comorbidity; traumatic brain injury; prognostic review; mortality; cognitive status;  
6  
7  
8 physical status; age; sex  
9  
10  
11  
12  
13  
14  
15  
16  
17  
18  
19  
20  
21  
22  
23  
24  
25  
26  
27  
28  
29  
30  
31  
32  
33  
34  
35  
36  
37  
38  
39  
40  
41  
42  
43  
44  
45  
46  
47  
48  
49  
50  
51  
52  
53  
54  
55  
56  
57  
58  
59  
60

For peer review only



### Strengths and limitations of this study

- The study of comorbidity in traumatic brain injury (TBI) is important as any additional clinical entity can change future life course and injury outcomes
- To date, there has been no systematic review on the topic of comorbidity in TBI as it relates to all-cause mortality and functional status post injury; the protocol outlines a strategy for a study that intends to fill the gap
- Attention to known risk factors of adverse outcomes such as sex, age, and TBI severity will permit advanced risk stratification and inform future prognostic studies
- Biases associated with unequal sex and age distribution, residual confounding due to TBI- or comorbidity-related treatment effect could not be avoided
- Systematizing prognostic data on comorbidity in TBI is essential for patients, health care providers, policymakers, and health researchers.

## Introduction

Traumatic Brain Injury (TBI), defined as “*an alteration in brain function, or other evidence of brain pathology, caused by an external force,*”<sup>1</sup> is a major global health concern. According to the World Health Organization, death and disability from TBI is rising rapidly.<sup>2</sup> In the US, the total annual cost of TBI was estimated to be \$60.43 billion US dollars.<sup>3</sup> In Canada, a recent report by the Public Health Agency projected that the indirect economic cost of a TBI due to working-age death and disability will increase from \$7.3 billion in 2011 to \$8.2 billion by 2031, far exceeding that of other common neurological conditions (e.g., epilepsy, multiple sclerosis, Alzheimer’s Disease, combined, with estimated \$4.8 billion in 2011 and \$5.8 billion in 2031, respectively).<sup>4</sup> TBI may also exacerbate pre-existing disorders, or expedite the development of additional clinical conditions in both the older and younger populations, increasing direct and indirect costs associated with TBI.<sup>5</sup>

Of particular importance is that the presence of a comorbidity (i.e., additional disease or illness coexisting with an index disease<sup>6</sup>) or multiple comorbidities in patients with TBI is common,<sup>7-9</sup> and is associated with high rates of hospitalizations, decreased functional status, and all-cause mortality.<sup>7-9</sup> Studies have also shown that comorbid disorders may alter the treatment course of patients with TBI by affecting the treatments that these patients receive in both the acute and rehabilitation setting.<sup>7-9</sup> Specifically, among patients that present with a comorbid health condition, treating or managing comorbidities are often prioritized over addressing TBI itself.<sup>10-12</sup> Likewise, the presence of any chronic comorbidity in TBI may lead patients to consume a disproportionate amount of healthcare resources.<sup>13-14</sup> While previous research has documented number of comorbidities in patients with TBI,<sup>15-17</sup> it is currently unknown which comorbid disorders pre-exist in TBI across ages, develop over time, and which best predict outcomes

1  
2  
3 related to functional (cognitive and physical) status and early and late post-injury mortality. It is  
4 also unknown if the presence of comorbidity changes the effect of traditional TBI risk factors for  
5 these outcomes, such as TBI severity and mechanism.<sup>18-21</sup>  
6  
7

8  
9  
10 Finally, it must be highlighted that a patient's sex and age has also been shown to drive  
11 differences in early mortality and functional recovery.<sup>22-23</sup> Previous research highlighted that  
12 case fatality ratios are elevated in older patients (60+ years of age) compared to younger patients,  
13 with sex differences observed in individuals 20 to 39 years of age.<sup>23</sup> Females are also at greater  
14 risk for the development of somatic and psychiatric comorbidity and associated functional  
15 decline post injury.<sup>24</sup> Overall, despite the strong evidence that comorbidities lead to adverse  
16 outcomes and complications among patients with TBI, a data synthesis on this topic taking sex  
17 and age into account does not exist to date. This highlights the need to explore how age and sex  
18 associate with comorbidity risk factors in patients with TBI.  
19  
20

21  
22 As such, this protocol is for a systematic review on the topic of comorbidity in adult patients  
23 with TBI that aims to: (1) examine the relationship between comorbid disorder(s) and change in  
24 function after TBI and death; (2) determine the prognostic value of clinical characteristics of  
25 patients with TBI at baseline on the development of short, intermediate and long term adverse or  
26 beneficial outcome (s); and (3) review effects of comorbidity in the light of currently known risk  
27 factors of adverse outcomes ( i.e., sex, age, and injury severity).  
28  
29  
30  
31  
32  
33  
34  
35  
36  
37  
38  
39  
40  
41  
42  
43  
44  
45  
46  
47

## 48 **Methods and analysis**

49  
50  
51 The systematic review that this protocol describes will be conducted and reported in compliance  
52 with the Preferred Reporting Items for Systematic Reviews and Meta-Analyses (PRISMA)  
53 guidelines.<sup>25</sup> In accordance with these guidelines, this systematic review protocol was registered  
54  
55  
56  
57  
58  
59  
60

1  
2  
3 with the International Prospective Register of Systematic Reviews (PROSPERO) on June 22,  
4  
5 2017.<sup>26</sup>  
6  
7

### 8 **Data sources and searches**

9  
10 In collaboration with TBI and rehabilitation experts, and a Medical Information Specialist, a  
11 comprehensive search strategy for prognostic studies of TBI outcomes (i.e., functional status and  
12 mortality) was developed (Table 1). All English language peer-reviewed studies published  
13 between March 1997 to April 2017, with prospective or retrospective data collection and a  
14 longitudinal design, found through Medline, Central, Embase, Scopus, PsycINFO and  
15 bibliographies of identified articles will be included. Reference lists of included studies will be  
16 reviewed to identify any additional relevant studies. Search terms for each database are  
17 presented in Table S1.  
18  
19  
20  
21  
22  
23  
24  
25  
26  
27  
28

### 29 **Comorbidity definition**

30  
31 Feinstein defined comorbidity as “the existence or occurrence of any distinct additional entity  
32 during the clinical course of a patient who has the index disease under study”.<sup>5</sup> More recently,  
33 Valderas et al. defined it as “any additional condition that may occur during the clinical course of  
34 a patient who has an index condition that is the focus of interest”.<sup>27</sup> Currently, there is no gold-  
35 standard for assessing comorbidity in TBI patients and reports of comorbidity vary widely in the  
36 published work.<sup>18-21</sup> In population based studies, comorbid conditions can be identified  
37 according to the International Classification (ICD) diagnostic codes; or converted into summary  
38 comorbidity measures focused on selected conditions, such as the Charlson Comorbidity Index,  
39 Aggregated Diagnosis Groups (ADG), Elixhauser Index, or the Total Illness Burden Index.<sup>18-21</sup>  
40  
41 However, many papers focus on a single count of previously diagnosed chronic diseases that  
42 have shown a significant relation with death or functional outcomes in TBI population.<sup>13-16</sup>  
43  
44  
45  
46  
47  
48  
49  
50  
51  
52  
53  
54  
55  
56  
57  
58  
59  
60

1  
2  
3 Given that there is no consensus on the most appropriate method to construct comorbidity in TBI  
4  
5 or whether one type is preferred to another, this systematic review will set restrictions only  
6  
7 towards comorbid disorders being diagnosed, excluding self-report.  
8  
9

### 10 **Predictors and outcomes**

11  
12 *Predictors* will be collated into three domains: sociodemographic characteristics, TBI-related  
13 characteristics, and comorbidity. All comorbidity-related variables (comorbidity index severity  
14 or presence of comorbidity) will be treated as primary predictors; hypothesized  
15 sociodemographic (age and sex) and TBI-related variables (injury severity, mechanism, and time  
16 since injury), if reported, will be considered as secondary predictors of our outcome(s) of  
17 interest. We will report on only those predictors that have been shown to be statistically  
18 significantly associated with our outcome(s) in at least one study and with reported quantitative  
19 data (i.e., event rates, risk ratios [RRs], odds ratios [ORs], or hazard ratios [HRs]) to measure the  
20 association between predictors and outcomes.  
21  
22  
23  
24  
25  
26  
27  
28  
29  
30  
31  
32  
33

34 The following *outcomes* (either objectively documented or self-reported) will be considered:  
35 cognitive and physical status as assessed by the Glasgow Outcome Scale (GOS) with or without  
36 extended scores, Disability Rating Scale (DRS), Functional Independence Measure (FIM), the  
37 Functional Status Examination (FSE) or any other standardized functional measurement and  
38 mortality. In order for the previous objective (i.e., functional status) to be considered, the study  
39 has to define at least two time points' scores of functioning and/or has to provide details on when  
40 (at which time point since injury) a loss/gain/plato of function has been defined as a  
41 decline/improvement/stability. Should the definition of functional status vary amongst studies,  
42 the reported minimum change, expressed in percentage change, will be abstracted. For example,  
43 if the functional measure has a score in a range from zero to 10, and the minimum change  
44  
45  
46  
47  
48  
49  
50  
51  
52  
53  
54  
55  
56  
57  
58  
59  
60

1  
2  
3 reported by researchers for the sample was one, we will assign a 10% 'change' on this group's  
4  
5 functional capabilities.  
6  
7

### 8 **Inclusion and exclusion criteria**

9  
10 We will include studies that (1) primarily study comorbidity as it relates to our outcome(s) of  
11  
12 interest; and (2) targeted adult patients ( $\geq 18$  years of age) with a diagnosis of TBI on the basis of  
13  
14 the accepted definitions (not self-report), and followed them for any period of time. Studies will  
15  
16 neither be excluded based on the setting in which the research took place (acute care,  
17  
18 rehabilitation setting, community, etc.) nor means of diagnosis of comorbidity. However, the  
19  
20 following studies will be excluded: (1) more than 50% of participants had pre-existing TBIs or  
21  
22 severe comorbidity (i.e., neurological or psychiatric diseases) at the baseline assessment, and if  
23  
24 the subgroup with incident comorbidity and the patient outcome data could not be extracted  
25  
26 independent of pre-existing cases (i.e., present before TBI); and (2) study designs/formats in  
27  
28 letters to editors, reviews without data, case reports, or public reports, conference abstracts  
29  
30 articles with no primary data, studies that focus on therapeutic interventions, and theses.  
31  
32  
33  
34  
35

### 36 **Zero-time (baseline assessment)**

37  
38 The nature of our objectives related to development of adverse outcomes in the TBI population  
39  
40 (i.e., prognostic factors), raises the issue of zero-time bias. In prognostic studies, testing should  
41  
42 start at a defined point, called zero time. Designated zero times (i.e. baseline or first assessment)  
43  
44 vary between studies,<sup>28</sup> were majority of research from acute care/emergency studies performed  
45  
46 baseline assessment within first month after the injury and majority of rehabilitation or  
47  
48 community studies of prognosis performed baseline assessment prior to or at six-months post  
49  
50 injury mark.<sup>28</sup> The limiter to zero-time has been set at six-month.  
51  
52  
53  
54

### 55 **Study selection**

1  
2  
3 Two independent researchers (CX, SH) will assess study titles and abstracts. If the title or  
4  
5 abstract suggest that the study might meet the inclusion criteria, both reviewers will assess the  
6  
7 full article. Differences of opinion will be resolved by group discussion (CX, SH, and TM), with  
8  
9 the goal to reach consensus in each case. Studies failing to meet the inclusion criteria will be  
10  
11 excluded and the reason will be reported.  
12

### 13 **Data extraction and quality assessment**

14  
15 Study quality will be assessed independently by two researchers (TM, CX) using guidelines for  
16  
17 assessing prognostic studies.<sup>29</sup> First, two researchers will independently assess the items related  
18  
19 to potential sources of bias, namely: (i) study participation and attrition; (ii) prognostic factor and  
20  
21 outcome measurements; (iii) confounding measurement and account; and (iv) analyses). Then,  
22  
23 the same two reviewers will judge the presence of potential biases as “Yes”, “Partly”, “No”, or  
24  
25 “Unsure”. Following these steps, the Scottish Intercollegiate Guidelines Network (SIGN)<sup>30</sup>  
26  
27 methodology will be implemented where “++” will be assigned to each study when all or most  
28  
29 of the quality criteria were fulfilled (allowing one “Partly” while appraising all potential sources  
30  
31 of bias); “+” when some of the criteria were fulfilled; and “-” when few or no criteria fulfilled  
32  
33 (at least one “Yes”). In our review, we will refer to group “++” as ‘high quality studies’ and  
34  
35 group “+” as ‘moderate quality studies’. We will abstract data on the relationships between our  
36  
37 outcomes of interest and primary (i.e., comorbidity) and secondary (i.e., socio-demographic,  
38  
39 TBI-related) predictors only from studies with sufficient quality (i.e., ‘high’ and ‘moderate’  
40  
41 quality studies).<sup>30</sup>  
42  
43  
44  
45  
46  
47  
48  
49

### 50 **Dealing with missing data**

51  
52 Primary authors will be contacted in cases of missing data. The proportion of missing data will  
53  
54 be reported along with reasons where indicated. In the case of duplicate publications and  
55  
56  
57  
58  
59  
60

1  
2  
3 companion papers of a primary study, we will attempt to yield maximum scientific information  
4  
5 by abstraction of all available data. However, original publication (usually the earliest  
6  
7 publication version) will take priority in data analysis.  
8  
9

### 10 **Data synthesis and analysis**

11  
12 For the unadjusted analysis (Step 1), we will extract data from all studies that reported the effect  
13  
14 of comorbidity on mortality and functional status and report number of events (death and  
15  
16 functional decline/gain/plato) relative to the total number of participants in the group with  
17  
18 comorbid disorder(s) and control groups. The timeframe of follow-up assessments will be  
19  
20 categorized into (i) short term, i.e., up to three months post injury mark; (ii) intermediate, i.e., 3-  
21  
22 12 months (i.e., up to one year inclusive), and (iii) long-term, i.e., >1 year post-injury. These  
23  
24 points were arbitrarily set. We reserve the right to adjust follow-up time frames based on time  
25  
26 stratification applied in the included studies.  
27  
28  
29

30  
31 This stage will be followed by adjusted analysis (Step 2), where we will extract and analyze  
32  
33 quantitative data (i.e., ORs, RRs, and HRs) that were adjusted for hypothesized key confounders  
34  
35 (age, sex, TBI mechanism and severity, and/or baseline functional status) reflecting the  
36  
37 association between comorbidity and our outcomes of interest. Some of these variables, such as  
38  
39 age, sex, and TBI severity are considered as key confounders, and will be included in our list of  
40  
41 required adjusted variables for a study to be included in our primary analysis.<sup>29</sup> If the key  
42  
43 variables are not included in the final adjusted model, control for confounding variables will be  
44  
45 determined to be inadequate, which will be reflected in a risk of bias assessment table.<sup>29</sup> Where  
46  
47 possible, we will perform a meta-analytic analysis: pooled-effect outcomes for each group of  
48  
49 comorbid disorders will be calculated using inverse variance methods with random-effects  
50  
51  
52  
53  
54  
55  
56  
57  
58  
59  
60



1  
2  
3 models<sup>31</sup> and expressed as ORs and 95% CIs. Heterogeneity will be assessed using the I<sup>2</sup>  
4  
5  
6  
7  
8  
9  
10  
11  
12  
13  
14  
15  
16  
17  
18  
19  
20  
21  
22  
23  
24  
25  
26  
27  
28  
29  
30  
31  
32  
33  
34  
35  
36  
37  
38  
39  
40  
41  
42  
43  
44  
45  
46  
47  
48  
49  
50  
51  
52  
53  
54  
55  
56  
57  
58  
59  
60

models<sup>31</sup> and expressed as ORs and 95% CIs. Heterogeneity will be assessed using the I<sup>2</sup> statistic. P values of 0.05 or less will be considered as statistically significant.

## **Ethics and dissemination**

This systematic review aims to investigate the relationship between comorbidity and functional outcomes and death within short, moderate and long-term time frames after TBI, as well as determining the prognostic value of comorbidity, sociodemographic (i.e., age, sex), and injury-related characteristics on these outcomes. The strength of this systematic review and research program is in its methodology, making it possible to identify associations longitudinally, thus improving the quality of inductive inferences regarding the natural progression of associative values of hypothesized predictors on outcomes in patients with TBI of various severities.

Furthermore, our protocol was registered PROSPERO and was designed in keeping with best-practice methods where the multilevel risk of bias assessment<sup>32</sup> will allow us to detect the main flaws in the individual studies' design and inform on the future research of comorbidities in TBI. Moreover, the clinical criteria for the diagnoses of TBI and comorbidity will be collected and reported, as it is expected that they have a significant impact on the study results. Finally, multi-level knowledge translation activities throughout this research activity will be performed, ensuring that these results reach their intended knowledge users.

## **Limitations**

The present study includes the following limitations: (1) the limiter of six months for zero-time may not be optimal as some comorbid disorder (demyelinating, degenerative, etc.) may take longer time to develop ; (2) the assumption of expected heterogeneity in the primary studies with respect to TBI-related characteristics (i.e., injury/localization of injury, time since injury) with

1  
2  
3 severe TBI cases expect to be underrepresented; likewise severe comorbid disorders may  
4  
5 precluded TBI patients with milder severities of injury to participate in research, limiting the  
6  
7 precision of estimates of risk for severe TBI and comorbidity cases; (3) potentially unequal sex  
8  
9 and age distribution in primary studies, given that historically TBI has been considered an injury  
10  
11 of younger males and older females; (4) residual confounding due to TBI- or comorbidity-related  
12  
13 treatment effect; (5) expected complexity of assessing the risk of short-term functional change  
14  
15 (i.e., fluctuation); and (6) additional limitations relate to the exclusion of grey literature, non-  
16  
17 English language articles, and unpublished manuscripts and their potentially relevant results; the  
18  
19 decision was based on the extensive number of studies identified within the databases searched,  
20  
21 as well as limited empiric evidence about the potential impact of selective searching and  
22  
23 inclusion of these works on the results of systematic reviews.<sup>32</sup>  
24  
25  
26  
27  
28

29 Despite these limitations, this protocol is for a review, that is the first that comprehensively  
30  
31 synthesizes evidence on prognostic value of comorbidity in TBI patients, aiming to enrich  
32  
33 science and advance care provided to patients with comorbid disorders stemming from traumatic  
34  
35 brain injuries.  
36  
37

### 38 **Implications**

39  
40 The number of people surviving TBIs is increasing. While the neurological consequences of TBI  
41  
42 are well described, evidence is emerging on associations between brain injury, comorbid  
43  
44 disorders and adverse short and long-term outcomes post-injury.<sup>33,34</sup> The significant economic  
45  
46 and human costs of TBIs merit the call for systematic efforts to understand all factors that  
47  
48 contribute to adverse post-injury outcomes, including comorbidity;<sup>35</sup> all with the goal to allow  
49  
50 better risk stratification to guide management of brain injury acutely and at the chronic stages  
51  
52 post injury on a population level.  
53  
54  
55  
56  
57  
58  
59  
60

### **Funding sources**

The study was funded by the National Institutes of Health (NIH) under Award 1R21 HD08106-01 (PI: Dr. Angela Colantonio). AC is supported by the Canadian Institutes for Health Research Grant–Institute for Gender and Health (#CGW-126580). TM is supported by the postdoctoral research grant Alzheimer’s Association (AARF-16-442937). The funders had no role in study design, data collection, decision to publish, or preparation of the manuscript.

### **Competing interests**

The authors have no conflict of interest to declare pertaining to this review.

### **Authors' contributions**

Protocol concept and design: Tatyana Mollayeva, Angela Colantonio. Registry PROSPERO: Chen Xiong. Acquisition of data: Tatyana Mollayeva. Administrative, technical, and material support: Chen Xiong, Sara Hanafy. Statistical analysis approach: Vincy Chan, Zheng Jing Hu, Mitchell Sutton, Michael Escobar. Drafting of the manuscript: Tatyana Mollayeva. Critical revision of the manuscript for important intellectual content: All authors.

### **Human and Animal Rights and Informed Consent**

This article does not contain any studies with human or animal subjects performed by any of the authors.

### **Acknowledgments**

We gratefully acknowledge the involvement of Ms. Jessica Babineau, Information Specialist at the Toronto Rehabilitation Institute- University Health Network for her comprehensive literature search.

1  
2  
3 **Additional material**  
4

5  
6  
7 File name: Supplementary TableS1.Search details  
8

9  
10 File format: Table S1\_10072017.pdf  
11

12  
13  
14 Title of data: Search strategies.  
15

16  
17  
18 Description of data: This file provides the list of search terms used to  
19  
20 search Medline, Central, Embase, Scopus, PsycINFO, and supplemental  
21  
22 PubMed.  
23  
24  
25  
26  
27  
28  
29  
30  
31  
32  
33  
34  
35  
36  
37  
38  
39  
40  
41  
42  
43  
44  
45  
46  
47  
48  
49  
50  
51  
52  
53  
54  
55  
56  
57  
58  
59  
60

## References

1. Brain Injury Association of America. About Brain Injury. Retrieved June 12, 2017, from <http://www.biausa.org/about-brain-injury.htm>.
2. World Health Organization. 2006. Projections of Mortality and Burden of Disease, 2002–2030. Deaths by Income Group. [Computer file] Retrieved June 12, 2017, from [http://www.who.int/healthinfo/global\\_burden\\_disease/projections2002/en/](http://www.who.int/healthinfo/global_burden_disease/projections2002/en/).
3. Coronado VG, McGuire LC, Sarmiento K, Bell J, Lionbarger MR, Jones CD, Geller AI, Khoury N, Xu L. Trends in Traumatic Brain Injury in the U.S. and the public health response: 1995-2009. *J Safety Res.* 2012;43(4):299-307.
4. Public Health Agency of Canada. 2014. Mapping Connections: An Understanding of Neurological Conditions in Canada. Ottawa, ON: Public Health Agency of Canada. Retrieved June 12, 2017, from <http://www.phac-aspc.gc.ca/publicat/cd-mc/mc-ec/assets/pdf/mc-ec-eng.pdf>.
5. Colantonio A, Saverino C, Zagorski B, Swaine B, Lewko J, Jaglal S et al. Hospitalizations and Emergency Department Visits for TBI in Ontario. *Can J Neurol Sci.* 2010; 37(6): 783–90.
6. Feinstein AR. The pre-therapeutic classification of co-morbidity in chronic disease. *J Chron Disease.* 1970; 23: 455–68.
7. Trevena L, Cameron I. Traumatic brain injury - long term care of patients in general practice. *Aust Fam Physician.* 2011;40(12):956-61.
8. Brooks JC, Shavelle RM, Strauss DJ, Hammond FM, Harrison-Felix CL. Long-Term Survival After Traumatic Brain Injury Part II: Life Expectancy. *Arch Phys Med Rehabil.* 2015; 96(6):1000-5.

- 1  
2  
3 9. Fu TS, Jing R, McFaul SR, Cusimano MD. Recent trends in hospitalization and in-  
4  
5 hospital mortality associated with traumatic brain injury in Canada: A nationwide,  
6  
7 population-based study. *J Trauma Acute Care Surg.* 2015; 79(3 Suppl 1):449-55.  
8  
9
- 10 10. Popescu C, Angheliescu A, Daia C, Onose G. Actual data on epidemiological evolution  
11  
12 and prevention endeavours regarding traumatic brain injury. *J Med Life.* 2015;8(3):272-7.  
13  
14
- 15 11. Valderas JM, Starfiels B, Sibbald B, Salisbury C, Roland M. Defining comorbidity:  
16  
17 implications for understanding health and health services. *Ann Fam Med.* 2009; 7:357-63.  
18  
19
- 20 12. Gardizi E, Hanks RA, Millis SR, Figueroa MJ. Comorbidity and insurance as predictors  
21  
22 of disability following traumatic brain injury. *Arch Phys Med Rehabil.* 2014; 95:2396–  
23  
24 401.  
25  
26
- 27 13. Coronado VG, Thomas KE, Sattin RW, Johnson RL. The CDC traumatic brain injury  
28  
29 surveillance system: Characteristics of persons aged 65 years and older hospitalized with  
30  
31 a TBI. *J Head Trauma Rehabil.* 2005; 20(3): 215–28.  
32  
33
- 34 14. Colantonio A, Gerber G, Bayley M, Deber R, Yin J, Kim H. Differential profiles for  
35  
36 patients with traumatic and non-traumatic brain injury. *J Rehabil Med.* 2011; 43(4): 311–  
37  
38 15  
39  
40
- 41 15. Thompson HJ, Dikmen S, Temkin N. Prevalence of comorbidity and its association with  
42  
43 traumatic brain injury and outcomes in older adults. *Res Gerontol Nurs.* 2012; 5(1): 17–  
44  
45 24  
46  
47
- 48 16. Gardizi E, Hanks RA, Millis SR, Figueroa MJ. Comorbidity and insurance as predictors  
49  
50 of disability following traumatic brain injury. *Arch Phys Med Rehabil.* 2014; 95(12):  
51  
52 2396–01.  
53  
54  
55  
56  
57  
58  
59  
60

- 1  
2  
3  
4  
5  
6  
7  
8  
9  
10  
11  
12  
13  
14  
15  
16  
17  
18  
19  
20  
21  
22  
23  
24  
25  
26  
27  
28  
29  
30  
31  
32  
33  
34  
35  
36  
37  
38  
39  
40  
41  
42  
43  
44  
45  
46  
47  
48  
49  
50  
51  
52  
53  
54  
55  
56  
57  
58  
59  
60
17. Kumar RG, Juengst SB, Wang Z, Dams-O'Connor K, Dikmen SS, O'Neil-Pirozzi TM, Dahdah MN, Hammond FM, Felix ER, Arenth PM, Wagner AK. Epidemiology of Comorbid Conditions Among Adults 50 Years and Older With Traumatic Brain Injury. *J Head Trauma Rehabil.* 2017 [Epub ahead of print] doi: 10.1097/HTR.0000000000000273.
18. Fu TS, Jing R, McFaul SR, Cusimano MD. Recent trends in hospitalization and in-hospital mortality associated with traumatic brain injury in Canada: A nationwide, population-based study. *J Trauma Acute Care Surg.* 2015; 79(3):449-54.
19. Ventura T, Harrison-Felix C, Carlson N, Diguseppi C, Gabella B, Brown A, Devivo M, Whiteneck G. Mortality after discharge from acute care hospitalization with traumatic brain injury: a population-based study. *Arch Phys Med Rehabil.* 2010;91(1):20-9.
20. Hodgkinson A, Veerabangsa A, Drane D, McCluskey A. Service utilization following traumatic brain injury. *J Head Trauma Rehabil.* 2000;15(6):1208-26.
21. Perrin PB, Niemeier JP, Mougeot JL, Vannoy CH, Hirsch MA, Watts JA, Rossman W, Grafton LM, Guerrier TD, Pershad R, Kingsbury CA, Bartel SW, Whitney MP. Measures of injury severity and prediction of acute traumatic brain injury outcomes. *J Head Trauma Rehabil.* 2015; 30(2):136-42.
22. Krasny-Pacini A, Chevignard M, Lancien S, Escolano S, Laurent-Vannier A, De Agostini M, Meyer P. Executive function after severe childhood traumatic brain injury - Age-at-injury vulnerability periods: The TGE prospective longitudinal study. *Ann Phys Rehabil Med.* 2017;60(2):74-82.
23. Klauber MR, Marshall LF, Barrett-Connor E, et al: Prospective study of patients hospitalized with head injury in San Diego County, 1978. *Neurosurgery.* 1981; 9:236-41.

- 1  
2  
3  
4  
5  
6  
7  
8  
9  
10  
11  
12  
13  
14  
15  
16  
17  
18  
19  
20  
21  
22  
23  
24  
25  
26  
27  
28  
29  
30  
31  
32  
33  
34  
35  
36  
37  
38  
39  
40  
41  
42  
43  
44  
45  
46  
47  
48  
49  
50  
51  
52  
53  
54  
55  
56  
57  
58  
59  
60
24. Slewa-Younan S, van den Berg S, Baguley IJ, Nott M, Cameron ID. Towards an understanding of sex differences in functional outcome following moderate to severe traumatic brain injury: a systematic review. *J Neurol Neurosurg Psychiatry*. 2008;79(11):1197-201.
  25. Moher D, Liberati A, Tetzlaff J, Altman DG. Preferred reporting items for systematic reviews and meta-analyses for PRISMA statement. *PLoS Medicine*. 2009; 6(7).
  26. PROSPERO- International Prospective Register of Systematic Reviews. [<http://www.crd.york.ac.uk/prospero/>].
  27. Valderas JM, Starfiels B, Sibbald B, Salisbury C, Roland M. Defining comorbidity: implications for understanding health and health services. *Ann Fam Med*. 2009; 7:357-363.
  28. Mollayeva T, Kendzerska T, Mollayeva S, Shapiro CM, Colantonio A, Cassidy JD. A systematic review of fatigue in patients with traumatic brain injury: the course, predictors and consequences. *Neurosci Biobehav Rev*. 2014;47: 684-716.
  29. Hayden JA, Cote P, Bombardier C. Evaluation of the quality of prognosis studies in systematic reviews. *Ann Intern Med*. 2006; 144: 427-37.
  30. Scottish Intercollegiate Guidelines Network: Published Guidelines. Retrieved 12 06 2017, from <http://www.sign.ac.uk/guidelines/>
  31. Hardy RJ, Thompson SG. Detecting and describing heterogeneity in meta-analysis. *Stat Med*. 1998; 17(8):841-56.
  32. Hartling L, Featherstone R, Nuspl M, Shave K, Dryden DM, Vandermeer B. Grey literature in systematic reviews: a cross-sectional study of the contribution of non-English



1  
2  
3 reports, unpublished studies and dissertations to the results of meta-analyses in child-  
4  
5 relevant reviews. Reference: *BMC Med Res Methodol.* 2017;17(1):64.  
6  
7

8 33. Shukla D, Devi BI, Agrawal A. Outcome measures for traumatic brain injury. *Clin*  
9  
10 *Neurol Neurosurg.* 2011; 113(6):435-41.  
11

12 34. Nichol AD, Higgins AM, Gabbe BJ, Murray LJ, Cooper DJ, Cameron PA. Measuring  
13  
14 functional and quality of life outcomes following major head injury: common scales and  
15  
16 checklists. *Injury.* 2011;42(3):281-7.  
17  
18

19 35. Charlson ME, Pompei P, Ales KL, MacKenzie CR. A new method of classifying  
20  
21 prognostic comorbidity in longitudinal studies: development and validation. *J Chronic*  
22  
23 *Dis.* 1987;40(5):373-83.  
24  
25  
26  
27  
28  
29  
30  
31  
32  
33  
34  
35  
36  
37  
38  
39  
40  
41  
42  
43  
44  
45  
46  
47  
48  
49  
50  
51  
52  
53  
54  
55  
56  
57  
58  
59  
60

**Table 1.** Prognosis, traumatic brain injury (TBI) and outcomes-related search terms (from Medline search strategy).

|                   |                                                                                                                                                                                                                                                                                                                                                                                                                                                                                                                                                                                                                                                                                                                                                                                                                                                                                                                                                                                                                                          |
|-------------------|------------------------------------------------------------------------------------------------------------------------------------------------------------------------------------------------------------------------------------------------------------------------------------------------------------------------------------------------------------------------------------------------------------------------------------------------------------------------------------------------------------------------------------------------------------------------------------------------------------------------------------------------------------------------------------------------------------------------------------------------------------------------------------------------------------------------------------------------------------------------------------------------------------------------------------------------------------------------------------------------------------------------------------------|
| Prognosis terms   | Exp cohort studies/ or exp prognosis/ or exp morbidity/ or exp mortality/ or exp survival analysis/ or exp models, statistical/ or prognos*.tw./ or predict*.tw./ or course*.tw./ or diagnosed.tw./ or cohort*.tw./ or death.tw./ or exp treatment outcome/ or "early termination of clinical trials"/ or treatment failure/ incidence/                                                                                                                                                                                                                                                                                                                                                                                                                                                                                                                                                                                                                                                                                                  |
| TBI terms         | Exp brain injuries/ or Craniocerebral Trauma/ or exp Head Injuries, Closed/ or exp Skull Fractures/ or mTBI*2.tw,kw. or tbi*2.tw,kw. or concuss*.tw,kw. or ((head* or cerebr* or crani* or skull* or intracran*) adj2 (injur* or trauma* or damag* or wound* or swell* or oedema* or edema* or fracture* or contusion* or pressur*).tw,kw. or ((brain* or cerebr* or intracerebr* or crani* or intracran* or head* or subdural* or epidural* or extradural*) adj (haematoma* or hematoma* or hemorrhag* or haemorrhag* or bleed*).tw,kw.                                                                                                                                                                                                                                                                                                                                                                                                                                                                                                 |
| Comorbidity terms | Exp Comorbidity/ or exp Risk Adjustment/ or (comorbid* or co morbid* or multimorbid* or multi morbid*).tw,kw. or (polypatholog* or poly-patholog*).tw,kw. or ((clinical* or medical*) adj3 complex*).tw,kw. or ((coexist* or co exist* or cooccur* or co-occur* or multipl*) adj3 (illness* or disease* or disorder* or condition* or complication* or diagnos* or risk*).tw,kw. or (multidisease? or multi-disease? or (multiple adj (ill* or disease? or condition? or syndrom* or disorder?))).tw,kw. or ((several* or various or (two adj2 more) or concomitant or conjoined or concurrent) adj3 (morbid* or ill* or disease* or sick* or condition*).tw,kw. Or "comorbidity-polypharmacy score".tw,kw. or ('charlson comorbidity index' or 'CCI' or 'CMI' or elixhauser or 'BOD index' or 'cumulative index rating scale' or 'CIRS' or 'Coroni-Huntley index' or 'DUSOI index' or 'Hallstrom index' or 'Hurwitz index' or 'Incalzi index', 'Kaplan index', 'Liu index', 'Shwartz index' or 'comorbidity-polypharmacy score').tw,kw. |
| Outcomes terms    | Exp Mortality/ or exp morbidity/ or (morbidit* or mortalit*).tw,kw. or function*.mp.                                                                                                                                                                                                                                                                                                                                                                                                                                                                                                                                                                                                                                                                                                                                                                                                                                                                                                                                                     |

**Supplementary Table S1.** Search details.

Searches conducted in Medline (including Medline in Process and other non-indexed citations, ePubs and Medline Daily), Embase, Cochrane Central Register of Controlled Trials, and PsycINFO. Searches were limited from 1997 to May 2017. Searches were limited to English language papers, and to an adult, human population when possible. Searches were conducted by an Information Specialist (JB).

**PRE-DUPLICATE REMOVAL**

*TOTAL Results: 9414*

Medline: 2860

Central: 178

Embase: 5468

PsycINFO: 908

**POST-DUPLICATE REMOVAL**

*TOTAL Results: 7443*

*Duplicates removed: 1971*

Medline: 2748

Central: 116

Embase: 4088

PsycINFO: 491

Database: Ovid MEDLINE(R) Epub Ahead of Print, In-Process & Other Non-Indexed Citations, Ovid MEDLINE(R) Daily and Ovid MEDLINE(R) <1946 to Present>  
Search Strategy:

- 
- 1 exp brain injuries/ (59169)
  - 2 Craniocerebral Trauma/ (21199)
  - 3 exp Head Injuries, Closed/ (9232)
  - 4 exp Skull Fractures/ (20700)
  - 5 mTBI\*2.tw,kw. (1835)
  - 6 tbi\*2.tw,kw. (20636)
  - 7 concuss\*.tw,kw. (6496)
  - 8 ((head\* or cerebr\* or crani\* or skull\* or intracran\*) adj2 (injur\* or trauma\* or damag\* or wound\* or swell\* or oedema\* or edema\* or fracture\* or contusion\* or pressur\*).tw,kw. (75791)
  - 9 ((brain\* or cerebr\* or intracerebr\* or crani\* or intracran\* or head\* or subdural\* or epidural\* or extradural\*) adj (haematoma\* or hematoma\* or hemorrhag\* or haemorrhag\* or bleed\*).tw,kw. (42638)
  - 10 or/1-9 (185742)
  - 11 exp Comorbidity/ (88810)
  - 12 exp Risk Adjustment/ (2770)
  - 13 (comorbid\* or co morbid\* or multimorbid\* or multi morbid\*).tw,kw. (131913)
  - 14 (polypatholog\* or poly-patholog\*).tw,kw. (151)
  - 15 ((clinical\* or medical\*) adj3 complex\*).tw,kw. (11314)

- 16 ((coexist\* or co exist\* or cooccur\* or co-occur\* or multipl\*) adj3 (illness\* or disease\* or disorder\* or condition\* or complication\* or diagnos\* or risk\*)).tw,kw. (69114)
- 17 (multidisease? or multi-disease? or (multiple adj (ill\* or disease? or condition? or syndrom\* or disorder?))).tw,kw. (3721)
- 18 ((several\* or various or (two adj2 more) or concomitant or conjoined or concurrent) adj3 (morbid\* or ill\* or disease\* or sick\* or condition\*)).tw,kw. (129147)
- 19 "comorbidity-polypharmacy score".tw,kw. (11)
- 20 ('charlson comorbidity index' or 'CCI' or 'CMI' or elixhauser or 'BOD index' or 'cumulative index rating scale' or 'CIRS' or 'Coroni-Huntley index' or 'DUSOI index' or 'Hallstrom index' or 'Hurwitz index' or 'Incalzi index', 'Kaplan index', 'Liu index', 'Shwartz index' or 'comorbidity-polypharmacy score').tw,kw. (10394)
- 21 or/11-20 (394772)
- 22 10 and 21 (5122)
- 23 exp Mortality/ (335478)
- 24 exp morbidity/ (467773)
- 25 (morbidit\* or mortalit\*).tw,kw. (760891)
- 26 function\*.mp. (3282516)
- 27 or/23-26 (4495784)
- 28 exp cohort studies/ (1680971)
- 29 exp prognosis/ (1379668)
- 30 exp survival analysis/ (241795)
- 31 exp models, statistical/ (344993)
- 32 prognos\*.tw,kw. (492733)
- 33 predict\*.tw,kw. (1261259)
- 34 course\*.tw,kw. (546731)
- 35 diagnosed.tw,kw. (461120)
- 36 cohort\*.tw,kw. (423751)
- 37 death.tw,kw. (584394)
- 38 exp treatment outcome/ (841041)
- 39 "early termination of clinical trials"/ (544)
- 40 treatment failure/ (31446)
- 41 incidence/ (222806)
- 42 or/28-41 (5055925)
- 43 27 or 42 (8021818)
- 44 22 and 43 (3756)
- 45 44 not (exp animals/ not exp humans/) (3301)
- 46 45 not (exp children/ not exp adults/) (3118)
- 47 limit 46 to english language (2860)
- 48 remove duplicates from 47 (2750)**

\*\*\*\*\*

Database: Embase <1974 to 2017 May 10>

Search Strategy:

-----  
1 exp brain injury/ (148571)

1  
2  
3 2 head injury/ (44023)  
4 3 mTBI\*2.tw. (2763)  
5 4 tbi\*2.tw. (32342)  
6 5 concuss\*.tw. (7543)  
7 6 ((head\* or cerebr\* or crani\* or skull\* or intracran\*) adj2 (injur\* or trauma\* or  
8 damag\* or wound\* or swell\* or oedema\* or edema\* or fracture\* or contusion\* or  
9 pressur\*)).tw,kw. (96428)  
10 7 ((brain\* or cerebr\* or intracerebr\* or crani\* or intracran\* or head\* or subdural\* or  
11 epidural\* or extradural\*) adj (haematoma\* or hematoma\* or hemorrhag\* or haemorrhag\*  
12 or bleed\*)).tw,kw. (59251)  
13 8 or/1-7 (291625)  
14 9 comorbidity/ (177225)  
15 10 risk assessment/ (409214)  
16 11 exp comorbidity assessment/ (9540)  
17 12 (comorbid\* or co morbid\* or multimorbid\* or multi morbid\*).tw,kw. (217271)  
18 13 (polypatholog\* or poly-patholog\*).tw,kw. (290)  
19 14 ((clinical\* or medical\*) adj3 complex\*).tw,kw. (15500)  
20 15 ((coexist\* or co exist\* or cooccur\* or co-occur\* or multipl\*) adj3 (illness\* or  
21 disease\* or disorder\* or condition\* or complication\* or diagnos\* or risk\*)).tw,kw.  
22 (94039)  
23 16 (multidisease? or multi-disease? or (multiple adj (ill\* or disease? or condition? or  
24 syndrom\* or disorder?))).tw,kw. (4710)  
25 17 ((several\* or various or (two adj2 more) or concomitant or conjoined or concurrent)  
26 adj3 (morbid\* or ill\* or disease\* or sick\* or condition\*)).tw,kw. (163497)  
27 18 "comorbidity-polypharmacy score".tw,kw. (15)  
28 19 ('charlson comorbidity index' or 'CCI' or 'CMI' or elixhauser or 'BOD index' or  
29 'cumulative index rating scale' or 'CIRS' or 'Coroni-Huntley index' or 'DUSOI index' or  
30 'Hallstrom index' or 'Hurwitz index' or 'Incalzi index', 'Kaplan index', 'Liu index',  
31 'Shwartz index' or 'comorbidity-polypharmacy score').tw,kw. (19018)  
32 20 or/9-19 (943533)  
33 21 8 and 20 (15388)  
34 22 exp mortality/ (858109)  
35 23 exp morbidity/ (299827)  
36 24 (morbidit\* or mortalit\*).tw,kw. (1038507)  
37 25 function\*.mp. (4279406)  
38 26 or/22-25 (5472712)  
39 27 cohort analysis/ (287239)  
40 28 prognosis/ (506894)  
41 29 survival analysis/ (3712)  
42 30 exp survival/ (845725)  
43 31 statistical model/ (136685)  
44 32 exp "prediction and forecasting"/ (1010760)  
45 33 prognos\*.tw,kw. (700803)  
46 34 predict\*.tw,kw. (1580756)  
47 35 course\*.tw,kw. (702204)  
48 36 diagnosed.tw,kw. (688998)  
49  
50  
51  
52  
53  
54  
55  
56  
57  
58  
59  
60

1  
 2  
 3 37 cohort\*.tw,kw. (649460)  
 4 38 death.tw,kw. (778611)  
 5 39 exp treatment outcome/ (1236966)  
 6 40 "early termination of clinical trial"/ (204)  
 7 41 exp treatment failure/ (108708)  
 8 42 exp incidence/ (330423)  
 9 43 or/27-42 (5901375)  
 10 44 26 or 43 (9681606)  
 11 45 21 and 44 (10931)  
 12 46 45 not ((exp animals/ or exp animal experimentation/ or nonhuman/) not exp  
 13 human/) (9877)  
 14 47 46 not ((exp embryo/ or exp fetus/ or exp juvenile/) not exp adult/) (8968)  
 15 48 limit 47 to english language (8463)  
 16 49 limit 48 to embase (5871)  
 17 50 limit 49 to (conference abstract or conference paper or "conference review") (179)  
 18 51 49 not 50 (5692)  
 19 52 **limit 51 to yr="1997 -Current" (5468)**

\*\*\*\*\*

24  
 25  
 26  
 27 Database: EBM Reviews - Cochrane Central Register of Controlled Trials <April 2017>  
 28 Search Strategy:  
 29 -----

30  
 31 1 exp brain injuries/ (1135)  
 32 2 Craniocerebral Trauma/ (247)  
 33 3 exp Head Injuries, Closed/ (167)  
 34 4 exp Skull Fractures/ (192)  
 35 5 mTBI\*2.tw,kw. (122)  
 36 6 tbi\*2.tw,kw. (1306)  
 37 7 concuss\*.tw,kw. (221)  
 38 8 ((head\* or cerebr\* or crani\* or skull\* or intracran\*) adj2 (injur\* or trauma\* or  
 39 damag\* or wound\* or swell\* or oedema\* or edema\* or fracture\* or contusion\* or  
 40 pressur\*)),tw,kw. (3278)  
 41 9 ((brain\* or cerebr\* or intracerebr\* or crani\* or intracran\* or head\* or subdural\* or  
 42 epidural\* or extradural\*) adj (haematoma\* or hematoma\* or hemorrhag\* or haemorrhag\*  
 43 or bleed\*)),tw,kw. (3605)  
 44 10 or/1-9 (8539)  
 45 11 exp Comorbidity/ (3012)  
 46 12 exp Risk Adjustment/ (20)  
 47 13 (comorbid\* or co morbid\* or multimorbid\* or multi morbid\*).tw,kw. (9750)  
 48 14 (polypatholog\* or poly-patholog\*).tw,kw. (4)  
 49 15 ((clinical\* or medical\*) adj3 complex\*).tw,kw. (711)  
 50 16 ((coexist\* or co exist\* or cooccur\* or co-occur\* or multipl\*) adj3 (illness\* or  
 51 disease\* or disorder\* or condition\* or complication\* or diagnos\* or risk\*)),tw,kw. (4140)  
 52 17 (multidisease? or multi-disease? or (multiple adj (ill\* or disease? or condition? or  
 53 syndrom\* or disorder?))),tw,kw. (107)  
 54  
 55  
 56  
 57  
 58  
 59  
 60

- 1  
2  
3 18 ((several\* or various or (two adj2 more) or concomitant or conjoined or concurrent)  
4 adj3 (morbid\* or ill\* or disease\* or sick\* or condition\*)).tw,kw. (1145)  
5  
6 19 "comorbidity-polypharmacy score".tw,kw. (0)  
7  
8 20 ('charlson comorbidity index' or 'CCI' or 'CMI' or elixhauser or 'BOD index' or  
9 'cumulative index rating scale' or 'CIRS' or 'Coroni-Huntley index' or 'DUSOI index' or  
10 'Hallstrom index' or 'Hurwitz index' or 'Incalzi index', 'Kaplan index', 'Liu index',  
11 'Shwartz index' or 'comorbidity-polypharmacy score').tw,kw. (748)  
12 21 or/11-20 (17592)  
13 22 10 and 21 (214)  
14 23 22 not (exp animals/ not exp humans/) (214)  
15 24 23 not (exp Child/ not exp Adult/) (213)  
16 25 limit 24 to english language (185)  
17  
18 26 **limit 25 to yr="1997 -Current" (178)**

19  
20 \*\*\*\*\*

21  
22 Database: PsycINFO <1806 to May Week 1 2017>

23 Search Strategy:  
24  
25 -----

- 26 1 exp traumatic brain injury/ (15677)  
27 2 exp head injuries/ (5584)  
28 3 mTBI\*2.tw. (1312)  
29 4 tbi\*2.tw. (8651)  
30 5 concuss\*.tw. (2360)  
31 6 ((head\* or cerebr\* or crani\* or skull\* or intracran\*) adj2 (injur\* or trauma\* or  
32 damag\* or wound\* or swell\* or oedema\* or edema\* or fracture\* or contusion\* or  
33 pressur\*)).tw. (11318)  
34 7 ((brain\* or cerebr\* or intracerebr\* or crani\* or intracran\* or head\* or subdural\* or  
35 epidural\* or extradural\*) adj (haematoma\* or hematoma\* or hemorrhag\* or haemorrhag\*  
36 or bleed\*)).tw. (3029)  
37 8 or/1-7 (28382)  
38 9 comorbidity/ (27127)  
39 10 risk assessment/ (11895)  
40 11 (comorbid\* or co morbid\* or multimorbid\* or multi morbid\*).tw. (49497)  
41 12 (polypatholog\* or poly-patholog\*).tw. (23)  
42 13 ((clinical\* or medical\*) adj3 complex\*).tw. (2577)  
43 14 ((coexist\* or co exist\* or cooccur\* or co-occur\* or multipl\*) adj3 (illness\* or  
44 disease\* or disorder\* or condition\* or complication\* or diagnos\* or risk\*)).tw. (16826)  
45 15 (multidisease? or multi-disease? or (multiple adj (ill\* or disease? or condition? or  
46 syndrom\* or disorder?))).tw. (666)  
47 16 ((several\* or various or (two adj2 more) or concomitant or conjoined or concurrent)  
48 adj3 (morbid\* or ill\* or disease\* or sick\* or condition\*)).tw. (14708)  
49 17 "comorbidity-polypharmacy score".tw. (2)  
50 18 ('charlson comorbidity index' or 'CCI' or 'CMI' or elixhauser or 'BOD index' or  
51 'cumulative index rating scale' or 'CIRS' or 'Coroni-Huntley index' or 'DUSOI index' or  
52  
53  
54  
55  
56  
57  
58  
59  
60



1  
2  
3 'Hallstrom index' or 'Hurwitz index' or 'Incalzi index', 'Kaplan index', 'Liu index',  
4 'Shwartz index' or 'comorbidity-polypharmacy score').tw,tm. (2701)  
5  
6 19 or/9-18 (97253)  
7  
8 20 8 and 19 (1354)  
9  
10 21 limit 20 to animal (317)  
11  
12 22 limit 20 to human (1042)  
13  
14 23 20 not (21 not 22) (1071)  
15  
16 24 limit 23 to ((childhood <birth to 12 years> or adolescence <13 to 17 years>) and  
17 (100 childhood <birth to age 12 yrs> or 120 neonatal <birth to age 1 mo> or 140 infancy  
18 <2 to 23 mo> or 160 preschool age <age 2 to 5 yrs> or 180 school age <age 6 to 12 yrs>  
19 or 200 adolescence <age 13 to 17 yrs>)) (132)  
20  
21 25 limit 23 to (adulthood <18+ years> and ("300 adulthood <age 18 yrs and older>" or  
22 320 young adulthood <age 18 to 29 yrs> or 340 thirties <age 30 to 39 yrs> or 360 middle  
23 age <age 40 to 64 yrs> or "380 aged <age 65 yrs and older>" or "390 very old <age  
24 85 yrs and older>")) (589)  
25  
26 26 23 not (24 not 25) (1023)  
27  
28 27 limit 26 to english language (977)  
29  
30  
31  
32  
33  
34  
35  
36  
37  
38  
39  
40  
41  
42  
43  
44  
45  
46  
47  
48  
49  
50  
51  
52  
53  
54  
55  
56  
57  
58  
59  
60

**28 limit 27 to yr="1997 -Current" (908)**

\*\*\*\*\*



**PRISMA-P (Preferred Reporting Items for Systematic review and Meta-Analysis Protocols) 2015 checklist: recommended items to address in a systematic review protocol\***

| Section and topic                 | Item No | Checklist item                                                                                                                                                                                  | Location; page(s) within the manuscript |
|-----------------------------------|---------|-------------------------------------------------------------------------------------------------------------------------------------------------------------------------------------------------|-----------------------------------------|
| <b>ADMINISTRATIVE INFORMATION</b> |         |                                                                                                                                                                                                 |                                         |
| Title:                            |         |                                                                                                                                                                                                 |                                         |
| Identification                    | 1a      | Identify the report as a protocol of a systematic review                                                                                                                                        | Title, abstract, manuscript; pgs. 1-18  |
| Update                            | 1b      | If the protocol is for an update of a previous systematic review, identify as such                                                                                                              | NA; original review protocol            |
| Registration                      | 2       | If registered, provide the name of the registry (such as PROSPERO) and registration number                                                                                                      | PROSPERO: CRD42017070033                |
| Authors:                          |         |                                                                                                                                                                                                 |                                         |
| Contact                           | 3a      | Provide name, institutional affiliation, e-mail address of all protocol authors; provide physical mailing address of corresponding author                                                       | Title page: 1-2                         |
| Contributions                     | 3b      | Describe contributions of protocol authors and identify the guarantor of the review                                                                                                             | Pgs.18                                  |
| Amendments                        | 4       | If the protocol represents an amendment of a previously completed or published protocol, identify as such and list changes; otherwise, state plan for documenting important protocol amendments | N/A                                     |
| Support:                          |         |                                                                                                                                                                                                 |                                         |
| Sources                           | 5a      | Indicate sources of financial or other support for the review                                                                                                                                   | Pg. 17                                  |
| Sponsor                           | 5b      | Provide name for the review funder and/or sponsor                                                                                                                                               | Pg. 17                                  |
| Role of sponsor or funder         | 5c      | Describe roles of funder(s), sponsor(s), and/or institution(s), if any, in developing the protocol                                                                                              | Pg. 17                                  |
| <b>INTRODUCTION</b>               |         |                                                                                                                                                                                                 |                                         |
| Rationale                         | 6       | Describe the rationale for the review in the context of what is already known                                                                                                                   | Pgs. 8-9                                |
| Objectives                        | 7       | Provide an explicit statement of the question(s) the review will address with reference to participants, interventions, comparators, and outcomes (PICO)                                        | Pg. 9                                   |
| <b>METHODS</b>                    |         |                                                                                                                                                                                                 |                                         |

|                                    |     |                                                                                                                                                                                                                                                  |                             |
|------------------------------------|-----|--------------------------------------------------------------------------------------------------------------------------------------------------------------------------------------------------------------------------------------------------|-----------------------------|
| Eligibility criteria               | 8   | Specify the study characteristics (such as PICO, study design, setting, time frame) and report characteristics (such as years considered, language, publication status) to be used as criteria for eligibility for the review                    | Pg. 12                      |
| Information sources                | 9   | Describe all intended information sources (such as electronic databases, contact with study authors, trial registers or other grey literature sources) with planned dates of coverage                                                            | Pg. 12                      |
| Search strategy                    | 10  | Present draft of search strategy to be used for at least one electronic database, including planned limits, such that it could be repeated                                                                                                       | Supplementary file Table S1 |
| Study records:                     |     |                                                                                                                                                                                                                                                  |                             |
| Data management                    | 11a | Describe the mechanism(s) that will be used to manage records and data throughout the review                                                                                                                                                     | Pg. 13-14                   |
| Selection process                  | 11b | State the process that will be used for selecting studies (such as two independent reviewers) through each phase of the review (that is, screening, eligibility and inclusion in meta-analysis)                                                  | Pg. 13                      |
| Data collection process            | 11c | Describe planned method of extracting data from reports (such as piloting forms, done independently, in duplicate), any processes for obtaining and confirming data from investigators                                                           | Pg. 13-14                   |
| Data items                         | 12  | List and define all variables for which data will be sought (such as PICO items, funding sources), any pre-planned data assumptions and simplifications                                                                                          | Pgs.11-12                   |
| Outcomes and prioritization        | 13  | List and define all outcomes for which data will be sought, including prioritization of main and additional outcomes, with rationale                                                                                                             | Pg. 11                      |
| Risk of bias in individual studies | 14  | Describe anticipated methods for assessing risk of bias of individual studies, including whether this will be done at the outcome or study level, or both; state how this information will be used in data synthesis                             | Pgs.13-14                   |
| Data synthesis                     | 15a | Describe criteria under which study data will be quantitatively synthesised                                                                                                                                                                      | Pg. 14-15                   |
|                                    | 15b | If data are appropriate for quantitative synthesis, describe planned summary measures, methods of handling data and methods of combining data from studies, including any planned exploration of consistency (such as $I^2$ , Kendall's $\tau$ ) | Pg. 14                      |
|                                    | 15c | Describe any proposed additional analyses (such as sensitivity or subgroup analyses, meta-regression)                                                                                                                                            | Pg. 15                      |
|                                    | 15d | If quantitative synthesis is not appropriate, describe the type of summary planned                                                                                                                                                               | N/A                         |

1  
2  
3  
4  
5  
6  
7  
8  
9  
10  
11  
12  
13  
14  
15  
16  
17  
18  
19  
20  
21  
22  
23  
24  
25  
26  
27  
28  
29  
30  
31  
32  
33  
34  
35  
36  
37  
38  
39  
40  
41  
42  
43  
44  
45  
46  
47  
48  
49

|                                   |    |                                                                                                                               |           |
|-----------------------------------|----|-------------------------------------------------------------------------------------------------------------------------------|-----------|
| Meta-bias(es)                     | 16 | Specify any planned assessment of meta-bias(es) (such as publication bias across studies, selective reporting within studies) | N/A       |
| Confidence in cumulative evidence | 17 | Describe how the strength of the body of evidence will be assessed (such as GRADE)                                            | Pg. 13-14 |

**\* It is strongly recommended that this checklist be read in conjunction with the PRISMA-P Explanation and Elaboration (cite when available) for important clarification on the items. Amendments to a review protocol should be tracked and dated. The copyright for PRISMA-P (including checklist) is held by the PRISMA-P Group and is distributed under a Creative Commons Attribution Licence 4.0.**

*From: Shamseer L, Moher D, Clarke M, Ghersi D, Liberati A, Petticrew M, Shekelle P, Stewart L, PRISMA-P Group. Preferred reporting items for systematic review and meta-analysis protocols (PRISMA-P) 2015: elaboration and explanation. BMJ. 2015 Jan 2;349(jan02 1):g7647.*

peer review only

# BMJ Open

## Comorbidity and outcomes in traumatic brain injury: Protocol for a systematic review on functional status and risk of death.

|                                 |                                                                                                                                                                                                                                                                                                                                                                                                                                                                                                                                                                                                                                                                                                          |
|---------------------------------|----------------------------------------------------------------------------------------------------------------------------------------------------------------------------------------------------------------------------------------------------------------------------------------------------------------------------------------------------------------------------------------------------------------------------------------------------------------------------------------------------------------------------------------------------------------------------------------------------------------------------------------------------------------------------------------------------------|
| Journal:                        | <i>BMJ Open</i>                                                                                                                                                                                                                                                                                                                                                                                                                                                                                                                                                                                                                                                                                          |
| Manuscript ID                   | bmjopen-2017-018626.R1                                                                                                                                                                                                                                                                                                                                                                                                                                                                                                                                                                                                                                                                                   |
| Article Type:                   | Protocol                                                                                                                                                                                                                                                                                                                                                                                                                                                                                                                                                                                                                                                                                                 |
| Date Submitted by the Author:   | 04-Sep-2017                                                                                                                                                                                                                                                                                                                                                                                                                                                                                                                                                                                                                                                                                              |
| Complete List of Authors:       | Mollayeva , Tatyana; Toronto Rehabilitation Institute, Research; University of Toronto, Rehabilitation Sciences Institute<br>Xiong, Chen; Rehabilitation Sciences Institute , University of Toronto<br>Hanafy, Sara; Toronto Rehabilitation Institute-University Health Network, Research<br>Chan , Vincy ; Toronto Rehabilitation Institute , Research<br>Hu, Zheng Jing ; Toronto Rehabilitation Institute-University Health Network, Research<br>Sutton, Mitchell; Toronto Rehabilitation Institute-University Health Network, Research<br>Escobar, Michael ; University of Toronto Dalla Lana School of Public Health<br>Colantonio, Angela; University of Toronto, Rehabilitation Science Institute |
| <b>Primary Subject Heading</b>: | Epidemiology                                                                                                                                                                                                                                                                                                                                                                                                                                                                                                                                                                                                                                                                                             |
| Secondary Subject Heading:      | Research methods, Neurology                                                                                                                                                                                                                                                                                                                                                                                                                                                                                                                                                                                                                                                                              |
| Keywords:                       | comorbidity, traumatic brain injury, prognostic review, mortality, cognitive/physical status, sex and age stratification                                                                                                                                                                                                                                                                                                                                                                                                                                                                                                                                                                                 |
|                                 |                                                                                                                                                                                                                                                                                                                                                                                                                                                                                                                                                                                                                                                                                                          |

SCHOLARONE™  
Manuscripts

**TITLE:** Comorbidity and outcomes in traumatic brain injury: Protocol for a systematic review on functional status and risk of death.

**Authors:** Tatyana Mollayeva, MD, PhD<sup>1-3</sup>, Chen Xiong, MSc<sup>1-3</sup>, Sara Hanafy, MSc<sup>2,3</sup>, Vincy Chan, MPH, PhD<sup>2-4</sup>, Zheng Jing Hu, MSc<sup>5</sup>, Mitchell Sutton, MSc<sup>5</sup>, Michael Escobar, PhD<sup>5</sup>, Angela Colantonio, PhD<sup>1-3,5</sup>

**Author details**

<sup>1</sup>Rehabilitation Sciences Institute, Faculty of Medicine, University of Toronto, Canada

<sup>2</sup>Toronto Rehabilitation Institute-University Health Network, Canada

<sup>3</sup>Acquired Brain Injury Research Lab, University of Toronto, Canada

<sup>4</sup>Pediatric Oncology Group of Ontario, Canada

<sup>5</sup>Dalla Lana School of Public Health, University of Toronto

**Tatyana Mollayeva, MD, PhD (corresponding author)**

Rehabilitation Sciences Institute

University of Toronto

Toronto Rehabilitation Institute-University Health Network

550 University Avenue, Rm 11207

Toronto, Ontario M5G 2A2

tatyana.mollayeva@utoronto.ca

tel: 416-597-3422 ext 7848

fax: 416-946-8570

**Chen Xiong, MSc, PhD student**

1  
2  
3 Rehabilitation Sciences Institute

4  
5 Rehabilitation Sciences Building, University of Toronto

6  
7 500 University Avenue, Room 260

8  
9 Toronto, ON M5G 1V7

10  
11 chen.xiong@mail.utoronto.ca

12  
13 tel: 647-770-8366

14  
15 fax: 416-946-8570

16  
17  
18  
19  
20  
21  
22 **Sara Hanafy, MSc**

23  
24 Researcher-volunteer

25  
26 Toronto Rehabilitation Institute-University Health Network

27  
28 550 University Avenue

29  
30 Toronto, ON M5G 2A2

31  
32 sara.hanafy@utoronto.ca

33  
34 tel: 416-597-3422

35  
36 fax: 416-946-8570

37  
38  
39  
40  
41  
42  
43 **Vincy Chan, PhD, MPH**

44  
45 Toronto Rehabilitation Institute-University Health Network

46  
47 550 University Avenue

48  
49 Toronto, ON, M5G 2A2

50  
51 vincy.chan@uhn.ca

52  
53 416-597-3422 ext. 7845

**Zheng Jing Hu, MSc**

Summer research intern

Toronto Rehabilitation Institute-University Health Network

550 University Avenue, Rm 11-207

Toronto, Ontario M5G 2A2

Dalla Lana School of Public Health

University of Toronto

Zhengjing.hu@mail.utoronto.ca

tel: 416-597-3422

fax: 416-946-8570

**Mitchell Sutton, MSc**

Summer research intern

Toronto Rehabilitation Institute-University Health Network

550 University Avenue, Rm 11-207

Toronto, Ontario M5G 2A2

Dalla Lana School of Public Health

University of Toronto

mitchell.sutton@mail.utoronto.ca

tel: 416-597-3422

fax: 416-946-8570

**Michael Escobar, PhD**

Professor, Dalla Lana School of Public Health

Health Sciences Building

155 College Street, 6th Floor

Toronto, ON M5T 3M7

m.escobar@utoronto.ca

tel: 416- 978-7942

fax: 416-946-8570

**Angela Colantonio, PhD**

Director, Rehabilitation Sciences Institute

University of Toronto

Senior Scientist, Toronto Rehabilitation Institute-University Health Network

160-500 University Ave.

Toronto, Ontario M5G 1V7

angela.colantonio@utoronto.ca

tel: 416-978-1098

fax: 416-946-8570



## ABSTRACT

**Introduction:** Reports on the association between comorbidity and functional status and risk of death in patients with traumatic brain injury (TBI) have been inconsistent; it is currently unknown which additional clinical entities (comorbidities) have an adverse influence on the evolution of outcomes across the lifespan of males and females with TBI. The current protocol outlines a strategy for a systematic review of the current evidence examining the impact of comorbidity on functional status and early and late-term mortality, taking into account known risk factors of these adverse outcomes (i.e., demographic (age and sex), and injury-related characteristics).

**Methods and analysis:** A comprehensive search strategy for TBI prognosis, functional (cognitive and physical) status and mortality studies has been developed in collaboration with a medical information specialist of the large rehabilitation teaching hospital. All peer-reviewed English language studies with longitudinal design in adults with TBI of any severity, published from May 1997 to April 2017, found through Medline, Central, Embase, Scopus, PsycINFO and bibliographies of identified articles, will be considered eligible. Study quality will be assessed using published guidelines.

**Ethics and dissemination:** The authors will publish findings from this review in a peer-reviewed scientific journal (s) and present the results at national and international conferences. This work aims to understand how comorbidity may contribute to adverse outcomes in TBI, to inform risk stratification of patients and guide the management of brain injury acutely and at the chronic stages post-injury on a population level. *Registration details:* CRD42017070033.

1  
2  
3 **Keywords:** comorbidity; traumatic brain injury; prognostic review; mortality; cognitive status;  
4  
5 physical status; age; sex  
6  
7  
8  
9  
10  
11  
12  
13  
14  
15  
16  
17  
18  
19  
20  
21  
22  
23  
24  
25  
26  
27  
28  
29  
30  
31  
32  
33  
34  
35  
36  
37  
38  
39  
40  
41  
42  
43  
44  
45  
46  
47  
48  
49  
50  
51  
52  
53  
54  
55  
56  
57  
58  
59  
60

For peer review only

### Strengths and limitations of this study

- The study of comorbidity in traumatic brain injury (TBI) is important, as any additional clinical entity can change future life course and injury outcomes
- To date, there has been no systematic review on the topic of comorbidity in TBI as it relates to all-cause mortality and functional status post injury; the protocol outlines a strategy for a study that intends to fill the gap
- Attention to known risk factors of adverse outcomes such as sex, age, and TBI severity will permit advanced risk stratification and inform future prognostic studies
- Biases associated with unequal sex and age distribution, residual confounding due to TBI- or comorbidity-related treatment effect could not be avoided
- Systematizing prognostic data on comorbidity in TBI is essential for patients, health care providers, policymakers, and health researchers.

## Introduction

Traumatic Brain Injury (TBI), defined as “*an alteration in brain function, or other evidence of brain pathology, caused by an external force,*”<sup>1</sup> is a major global health concern. According to the World Health Organization, death and disability from TBI is rising rapidly.<sup>2</sup> In the US, the total annual cost of TBI was estimated to be \$60.43 billion US dollars.<sup>3</sup> In Canada, a recent report by the Public Health Agency projected that the indirect economic cost of a TBI due to working-age death and disability will increase from \$7.3 billion in 2011 to \$8.2 billion by 2031, far exceeding that of other common neurological conditions (e.g., epilepsy, multiple sclerosis, Alzheimer’s Disease, combined, with estimated \$4.8 billion in 2011 and \$5.8 billion in 2031, respectively).<sup>4</sup> TBI may also exacerbate pre-existing disorders, or expedite the development of additional clinical conditions in both the older and younger populations, increasing direct and indirect costs associated with TBI.<sup>5</sup>

Of particular importance is that the presence of a comorbidity (i.e., additional disease or illness coexisting with an index disease<sup>6</sup>) or multiple comorbidities in patients with TBI is common,<sup>7-9</sup> and is associated with high rates of hospitalizations, decreased functional status, and all-cause mortality.<sup>7-9</sup> Studies have also shown that comorbid disorders may alter the treatment course of patients with TBI by affecting the treatments that these patients receive in both the acute and rehabilitation setting.<sup>7-9</sup> Specifically, among patients with a comorbid health condition, treating or managing comorbidities are often prioritized over addressing the TBI itself.<sup>10-12</sup> Likewise, the presence of any chronic comorbidity in TBI may lead patients to consume a disproportionate amount of healthcare resources.<sup>13-14</sup> While previous research has documented number of comorbidities in patients with TBI,<sup>15-17</sup> it is currently unknown which comorbid disorders pre-exist in TBI across ages, develop over time, and which best predict outcomes related to

1  
2  
3 functional (cognitive and physical) status and early and late post-injury mortality. It is also  
4  
5 unknown if the presence of comorbidity changes the effect of traditional TBI risk factors for  
6  
7 these outcomes, such as TBI severity and mechanism.<sup>18-21</sup>  
8  
9

10 Finally, it must be highlighted that a patient's sex and age has also been shown to drive  
11  
12 differences in early mortality and functional recovery.<sup>22-23</sup> Previous research highlighted that  
13  
14 case fatality ratios are elevated in older patients (60+ years of age) compared to younger patients,  
15  
16 with sex differences observed in individuals 20 to 39 years of age.<sup>23</sup> Females are also at greater  
17  
18 risk for the development of somatic and psychiatric comorbidity and associated functional  
19  
20 decline post injury.<sup>24</sup> Overall, despite the strong evidence that comorbidities lead to adverse  
21  
22 outcomes and complications among patients with TBI, a data synthesis on this topic taking sex  
23  
24 and age into account does not exist to date. This highlights the need to explore how age and sex  
25  
26 associate with comorbidity risk factors in patients with TBI.  
27  
28  
29

30  
31 As such, this protocol is for a systematic review on the topic of comorbidity in adult patients  
32  
33 with TBI that aims to: (1) examine the relationship between comorbid disorder(s) and change in  
34  
35 function after TBI, and death; (2) determine the prognostic value of clinical characteristics of  
36  
37 patients with TBI at baseline on the development of short, intermediate and long term adverse or  
38  
39 beneficial outcome (s); and (3) review effects of comorbidity in the light of currently known risk  
40  
41 factors of adverse outcomes ( i.e., sex, age, and injury severity).  
42  
43  
44  
45  
46  
47

## 48 **Methods and analysis**

49  
50 The systematic review that this protocol describes will be conducted and reported in compliance  
51  
52 with the Preferred Reporting Items for Systematic Reviews and Meta-Analyses (PRISMA)  
53  
54 guidelines.<sup>25</sup> In accordance with these guidelines, this systematic review protocol was registered  
55  
56  
57  
58  
59  
60

1  
2  
3 with the International Prospective Register of Systematic Reviews (PROSPERO) on June 22,  
4  
5 2017.<sup>26</sup>  
6  
7

### 8 **Data sources and searches**

9

10 In collaboration with TBI and rehabilitation experts, and a Medical Information Specialist, a  
11 comprehensive search strategy for prognostic studies of TBI outcomes (i.e., functional status and  
12 mortality) was developed (Table 1). All English language peer-reviewed studies published  
13 between March 1997 to April 2017, with prospective or retrospective data collection and a  
14 longitudinal design, found through Medline, Central, Embase, Scopus, PsycINFO and  
15 bibliographies of identified articles will be included. Reference lists of included studies will be  
16 reviewed to identify any additional relevant studies. Search terms for each database are  
17 presented in Table S1.  
18  
19  
20  
21  
22  
23  
24  
25  
26  
27  
28

29 **Table 1.** Prognosis, traumatic brain injury (TBI) and outcomes-related search terms (from  
30 Medline search strategy).  
31  
32  
33  
34  
35  
36  
37  
38  
39  
40  
41  
42  
43  
44  
45  
46  
47  
48  
49  
50  
51  
52  
53  
54  
55  
56  
57  
58  
59  
60

|                   |                                                                                                                                                                                                                                                                                                                                                                                                                                                                                                                                                                                                                                                                                                                                                                                                                                                                                                                                                                                                                                          |
|-------------------|------------------------------------------------------------------------------------------------------------------------------------------------------------------------------------------------------------------------------------------------------------------------------------------------------------------------------------------------------------------------------------------------------------------------------------------------------------------------------------------------------------------------------------------------------------------------------------------------------------------------------------------------------------------------------------------------------------------------------------------------------------------------------------------------------------------------------------------------------------------------------------------------------------------------------------------------------------------------------------------------------------------------------------------|
| Prognosis terms   | Exp cohort studies/ or exp prognosis/ or exp morbidity/ or exp mortality/ or exp survival analysis/ or exp models, statistical/ or prognos*.tw./ or predict*.tw./ or course*.tw./ or diagnosed.tw./ or cohort*.tw./ or death.tw./ or exp treatment outcome/ or "early termination of clinical trials"/ or treatment failure/ incidence/                                                                                                                                                                                                                                                                                                                                                                                                                                                                                                                                                                                                                                                                                                  |
| TBI terms         | Exp brain injuries/ or Craniocerebral Trauma/ or exp Head Injuries, Closed/ or exp Skull Fractures/ or mTBI*2.tw,kw. or tbi*2.tw,kw. or concuss*.tw,kw. or ((head* or cerebr* or crani* or skull* or intracran*) adj2 (injur* or trauma* or damag* or wound* or swell* or oedema* or edema* or fracture* or contusion* or pressur*).tw,kw. or ((brain* or cerebr* or intracerebr* or crani* or intracran* or head* or subdural* or epidural* or extradural*) adj (haematoma* or hematoma* or hemorrhag* or haemorrhag* or bleed*).tw,kw.                                                                                                                                                                                                                                                                                                                                                                                                                                                                                                 |
| Comorbidity terms | Exp Comorbidity/ or exp Risk Adjustment/ or (comorbid* or co morbid* or multimorbid* or multi morbid*).tw,kw. or (polypatholog* or poly-patholog*).tw,kw. or ((clinical* or medical*) adj3 complex*).tw,kw. or ((coexist* or co exist* or cooccur* or co-occur* or multipl*) adj3 (illness* or disease* or disorder* or condition* or complication* or diagnos* or risk*).tw,kw. or (multidisease? or multi-disease? or (multiple adj (ill* or disease? or condition? or syndrom* or disorder?))).tw,kw. or ((several* or various or (two adj2 more) or concomitant or conjoined or concurrent) adj3 (morbid* or ill* or disease* or sick* or condition*).tw,kw. Or "comorbidity-polypharmacy score".tw,kw. or ('charlson comorbidity index' or 'CCI' or 'CMI' or elixhauser or 'BOD index' or 'cumulative index rating scale' or 'CIRS' or 'Coroni-Huntley index' or 'DUSOI index' or 'Hallstrom index' or 'Hurwitz index' or 'Incalzi index', 'Kaplan index', 'Liu index', 'Shwartz index' or 'comorbidity-polypharmacy score').tw,kw. |
| Outcomes terms    | Exp Mortality/ or exp morbidity/ or (morbidit* or mortalit*).tw,kw. or function*.mp.                                                                                                                                                                                                                                                                                                                                                                                                                                                                                                                                                                                                                                                                                                                                                                                                                                                                                                                                                     |

### Comorbidity definition

Feinstein defined comorbidity as “the existence or occurrence of any distinct additional entity during the clinical course of a patient who has the index disease under study”.<sup>5</sup> More recently, Valderas et al. defined it as “any additional condition that may occur during the clinical course of a patient who has an index condition that is the focus of interest”.<sup>27</sup> Canadian coding standards, the International Classification of Diseases Version 10 (ICD-10-CA) defines comorbidity as “a condition that coexists in addition to the most responsible diagnosis (MRDx) at the time of admission or that develops subsequently and meets at least one of the three criteria for significance”: (1) requires treatment beyond maintenance of the pre-existing condition; (2) increases the length of stay (LOC) by at least 24 hours; and/or (3) significantly affects the treatment received”.<sup>28</sup> Currently, there is no gold-standard for assessing comorbidity in TBI patients and reports of comorbidity vary widely in the published work.<sup>18-21</sup> In population based studies, comorbid conditions can be identified according to the International Classification of Diseases (ICD) diagnostic codes; or converted into summary comorbidity measures focused on selected conditions, such as the Charlson Comorbidity Index (CCI), Aggregated Diagnosis Groups (ADGs), Elixhauser Comorbidity Index, or the Total Illness Burden Index.<sup>18-21</sup> However, many papers focus on a single count of previously diagnosed chronic diseases that have shown a significant relation with death or functional outcomes in TBI population.<sup>13-16</sup> Given that there is no consensus on the most appropriate method to construct comorbidity in TBI or whether one type is preferred to another, this systematic review will set restrictions only towards comorbid disorders being diagnosed, excluding self-report. To account for inconsistencies between studies that will, at least partially, drive our results, close attention will be paid to definitions of comorbidity and assessment tools in each individual study when



1  
2  
3 analyzing and reporting results. In addition, the limiter zero-time (baseline assessment) will be  
4  
5 set at six-months. This historical time limiter will be set to allow us to, indirectly, distinguish  
6  
7 disorders that are chronic in nature (according to the World Health Organization, chronic  
8  
9 disorders are those that require care beyond six months, such as diabetes, cardiovascular  
10  
11 disorders, etc.), from those that may co-occur with TBI (neck injury, fractures, etc.) and those  
12  
13 that develop as a result of a TBI or associated impairments, both physical and psychological,  
14  
15 such as anxiety and/or mood disorders, infection disorders, etc. All attempts will be made to  
16  
17 present results of acute comorbidity and chronic comorbidity associations with studied outcomes  
18  
19 separately.  
20  
21  
22  
23

### 24 **Predictors and outcomes**

25  
26  
27 *Predictors* will be collated into three domains: sociodemographic characteristics, TBI-related  
28  
29 characteristics, and comorbidity. All comorbidity-related variables (comorbidity index severity  
30  
31 or presence of comorbidity) will be treated as primary predictors; hypothesized  
32  
33 sociodemographic (age and sex) and TBI-related variables (injury severity, mechanism, and time  
34  
35 since injury), if reported, will be considered as secondary predictors of our outcome(s) of  
36  
37 interest. We will report on only those predictors that have been shown to be statistically  
38  
39 significantly associated with our outcome(s) in at least one study and with reported quantitative  
40  
41 data (i.e., event rates, risk ratios [RRs], odds ratios [ORs], or hazard ratios [HRs]) to measure the  
42  
43 association between predictors and outcomes.  
44  
45  
46  
47

48 The following *outcomes* (either objectively documented or self-reported) will be considered:  
49  
50 cognitive and physical status as assessed by the Glasgow Outcome Scale (GOS) with or without  
51  
52 extended scores, Disability Rating Scale (DRS), Functional Independence Measure (FIM), the  
53  
54 Functional Status Examination (FSE) or any other standardized functional measurement and  
55  
56  
57  
58  
59  
60

1  
2  
3 mortality. In order for the previous objective (i.e., functional status) to be considered, the study  
4 has to define at least two time points' scores of functioning and/or has to provide details on when  
5 (at which time point since injury) a loss/gain/plateau of function has been defined as a  
6 decline/improvement/stability. Should the definition of functional status vary amongst studies,  
7 the reported minimum change, expressed in percentage change, will be abstracted. For example,  
8 if the functional measure has a score in a range from zero to 10, and the minimum change  
9 reported by researchers for the sample was one, we will assign a 10% 'change' on this group's  
10 functional capabilities.  
11  
12  
13  
14  
15  
16  
17  
18  
19  
20  
21

### 22 **Inclusion and exclusion criteria**

23  
24  
25 We will include studies that (1) primarily study comorbidity as it relates to our outcome(s) of  
26 interest; and (2) targeted adult patients (the mean age minus standard deviation is  $\geq 18$  years of  
27 age) with a diagnosis of TBI on the basis of the accepted definitions (not self-report), and  
28 followed them for any period of time. Studies of brain injury of only traumatic origin will be  
29 considered. Studies will neither be excluded based on the setting in which the research took place  
30 (acute care, rehabilitation setting, community, etc.) nor means of diagnosis of comorbidity.  
31 However, the following studies will be excluded: (1) more than 50% of participants had pre-  
32 existing TBIs or severe comorbidity (i.e., neurological or psychiatric diseases) at the baseline  
33 assessment, and if the subgroup with incident comorbidity and the patient outcome data could  
34 not be extracted independent of pre-existing cases (i.e., present before TBI); and (2) study  
35 designs/formats in letters to editors, reviews without data, case reports, or public reports,  
36 conference abstracts articles with no primary data, studies that focus on therapeutic interventions,  
37 and theses.  
38  
39  
40  
41  
42  
43  
44  
45  
46  
47  
48  
49  
50  
51  
52  
53  
54  
55  
56  
57  
58  
59  
60

### **Zero-time (baseline assessment)**

The nature of our objectives related to development of adverse outcomes in the TBI population (i.e., prognostic factors), raises the issue of zero-time bias. In prognostic studies, testing should start at a defined point, called zero time. Designated zero times (i.e. baseline or first assessment) vary between studies,<sup>28</sup> where the majority of research from acute care/emergency studies performed baseline assessment within the first month after injury and majority of rehabilitation or community studies of prognosis performed baseline assessment prior to or at six-months post injury mark.<sup>29</sup> The limiter to zero-time has been set at six-month.

### **Study selection**

Two independent researchers (CX, SH) will assess study titles and abstracts. If the title or abstract suggest that the study might meet the inclusion criteria, both reviewers will assess the full article. Differences of opinion will be resolved by group discussion (CX, SH, and TM), with the goal to reach consensus in each case. Studies failing to meet the inclusion criteria will be excluded and the reason will be reported.

### **Data extraction and quality assessment**

Study quality will be assessed independently by two researchers (TM, CX) using guidelines for assessing prognostic studies.<sup>30</sup> First, two researchers will independently assess the items related to potential sources of bias, namely: (i) study participation and attrition; (ii) prognostic factor and outcome measurements; (iii) confounding measurement and account; and (iv) analyses. Then, the same two reviewers will judge the presence of potential biases as “Yes”, “Partly”, “No”, or “Unsure”. Following these steps, the Scottish Intercollegiate Guidelines Network (SIGN)<sup>31</sup> methodology will be implemented where “++” will be assigned to each study when all or most of the quality criteria were fulfilled (allowing one “Partly” while appraising all potential sources

1  
2  
3 of bias); “+” when some of the criteria were fulfilled; and “-” when few or no criteria fulfilled  
4  
5 (at least one “Yes”). In our review, we will refer to group “++” as ‘high quality studies’ and  
6  
7 group “+” as ‘moderate quality studies’. We will abstract data on the relationships between our  
8  
9 outcomes of interest and primary (i.e., comorbidity) and secondary (i.e., socio-demographic,  
10  
11 TBI-related) predictors only from studies with sufficient quality (i.e., ‘high’ and ‘moderate’  
12  
13 quality studies).<sup>31</sup>

### 14 15 16 17 **Dealing with missing data**

18  
19 Primary authors will be contacted in cases of missing data. The proportion of missing data will  
20  
21 be reported along with reasons where indicated. In the case of duplicate publications and  
22  
23 companion papers of a primary study, we will attempt to yield maximum scientific information  
24  
25 by abstraction of all available data. However, original publication (usually the earliest  
26  
27 publication version) will take priority in data analysis.

### 28 29 30 31 **Dealing with publication bias**

32  
33 The predisposition of journals to favour publication of positive reports over negative  
34  
35 investigative findings and the reticence of authors to publish poor outcomes may lead to a high  
36  
37 chance that results of studies included in this review may be affected by these publication biases.  
38  
39 The most commonly used method to assess potential publication bias is the construction of a  
40  
41 funnel plot, which is not an optimal methodology in highly heterogeneous studies that precludes  
42  
43 expecting a symmetrical funnel shape.<sup>32</sup> To account for potential publication bias, we will apply  
44  
45 an expert opinion methodology<sup>33</sup> to inform the study selection process. We will ask researchers  
46  
47 and clinicians from our team with expertise in TBI about the probability of publication for small  
48  
49 and large sample size studies that considered the effect (i.e., positive or negative) of any  
50  
51 comorbidity in relationship to outcomes, and will report the average in their response. We will  
52  
53  
54  
55  
56  
57  
58  
59  
60

1  
2  
3 then apply the selection model on the published studies and calculate an estimate from the  
4  
5 published studies (without making any adjustments for publication bias). We will also report on  
6  
7 the quality of the study and funding information. Such an approach is not confounded by  
8  
9 heterogeneity as in the case of the funnel-plot approach.  
10  
11

### 12 13 14 15 **Data synthesis and analysis**

16  
17 For the unadjusted analysis (Step 1), we will extract data from all studies that reported the effect  
18  
19 of comorbidity on mortality and functional status and report number of events (death and  
20  
21 functional decline/gain/plateau) relative to the total number of participants in the group with  
22  
23 comorbid disorder(s) and control groups. The timeframe of follow-up assessments will be  
24  
25 categorized into (i) short term, i.e., up to three months post injury mark; (ii) intermediate, i.e., 3-  
26  
27 12 months (i.e., up to one year inclusive), and (iii) long-term, i.e., >1 year post-injury. These  
28  
29 points were arbitrarily set. We reserve the right to adjust follow-up time frames based on time  
30  
31 stratification applied in the included studies.  
32  
33  
34

35  
36 This stage will be followed by adjusted analysis (Step 2), where we will extract and analyze  
37  
38 quantitative data (i.e., ORs, RRs, and HRs) that will be adjusted for hypothesized key  
39  
40 confounders (age, sex, TBI mechanism and severity, and/or baseline functional status) reflecting  
41  
42 the association between comorbidity and our outcomes of interest. Some of these variables, such  
43  
44 as age, sex, and TBI severity are considered as key confounders, and will be included in our list  
45  
46 of required adjusted variables for a study to be included in our primary analysis.<sup>30</sup> If the key  
47  
48 variables are not included in the final adjusted model, control for confounding variables will be  
49  
50 determined to be inadequate, which will be reflected in a risk of bias assessment table.<sup>30</sup> Where  
51  
52 possible, we will perform a meta-analytic analysis: pooled-effect outcomes for each group of  
53  
54  
55  
56  
57  
58  
59  
60

1  
2  
3 comorbid disorders will be calculated using inverse variance methods with random-effects  
4 models<sup>31</sup> and expressed as ORs and 95% CIs. Heterogeneity will be assessed using the I<sup>2</sup>  
5  
6  
7  
8  
9  
10  
11  
12  
13  
14  
15  
16  
17  
18  
19  
20  
21  
22  
23  
24  
25  
26  
27  
28  
29  
30  
31  
32  
33  
34  
35  
36  
37  
38  
39  
40  
41  
42  
43  
44  
45  
46  
47  
48  
49  
50  
51  
52  
53  
54  
55  
56  
57  
58  
59  
60

comorbid disorders will be calculated using inverse variance methods with random-effects models<sup>31</sup> and expressed as ORs and 95% CIs. Heterogeneity will be assessed using the I<sup>2</sup> statistic. P values of 0.05 or less will be considered as statistically significant. In the case of statistical or clinical diversity in definitions of comorbidity and/or TBI, population of interest, and the statistical methodology used to quantify association in the studies, meta-analysis will not be performed and we will use a best-evidence synthesis approach, synthesizing findings from studies with sufficient quality through tabulation and qualitative description<sup>34</sup>.

## Discussion

### Ethics and dissemination

This systematic review aims to investigate the relationship between comorbidity and functional outcomes and death within short, moderate and long-term time frames after TBI, as well as determining the prognostic value of comorbidity, sociodemographic (i.e., age, sex), and injury-related characteristics on these outcomes. The strength of this systematic review and research program is in its methodology, making it possible to identify associations longitudinally, thus improving the quality of inductive inferences regarding the natural progression of associative values of hypothesized predictors on outcomes in patients with TBI of various severities. Furthermore, our protocol was registered in PROSPERO and was designed in keeping with best-practice methods where the multilevel risk of bias assessment<sup>26</sup> will allow us to detect the main flaws in the individual studies' design and inform on the future research of comorbidities in TBI. Moreover, the clinical criteria for the diagnoses of TBI and comorbidity will be collected and reported, as it is expected that they have a significant impact on the study results. Finally, multi-

1  
2  
3 level knowledge translation activities throughout this research activity will be performed,  
4  
5 ensuring that these results reach their intended knowledge users.  
6  
7

### 8 **Limitations**

9  
10 The present study includes the following limitations: (1) the limiter of six months for zero-time  
11  
12 may not be optimal as some comorbid disorder (demyelinating, degenerative, etc.) may take  
13  
14 longer time to develop ; (2) the assumption of expected heterogeneity in the primary studies with  
15  
16 respect to TBI-related characteristics (i.e., injury/localization of injury, time since injury) with  
17  
18 severe TBI cases expect to be underrepresented; likewise severe comorbid disorders may  
19  
20 precluded TBI patients with milder severities of injury to participate in research, limiting the  
21  
22 precision of estimates of risk for severe TBI and comorbidity cases; (3) potentially unequal sex  
23  
24 and age distribution in primary studies, given that historically TBI has been considered an injury  
25  
26 of younger males and older females; (4) residual confounding due to TBI- or comorbidity-related  
27  
28 treatment effect; (5) excepted complexity of assessing the risk of short-term functional change  
29  
30 (i.e., fluctuation); and (6) additional limitations relate to the exclusion of grey literature, articles  
31  
32 published in languages other than English, and limiting our searches to the past 20 years; this  
33  
34 decision was based on the extensive number of studies identified within the databases searched,  
35  
36 changes applied to clinical classifications and definitions of TBI, as well as limited empirical  
37  
38 evidence about the potential impact of selective searching and inclusion of earlier works on the  
39  
40 results of systematic reviews.<sup>35</sup>  
41  
42  
43  
44  
45  
46  
47

48 Despite these limitations, this protocol is for a review, that is the first that comprehensively  
49  
50 synthesizes evidence on prognostic value of comorbidity in TBI patients, aiming to enrich  
51  
52 science and advance care provided to patients with comorbid disorders stemming from traumatic  
53  
54 brain injuries.  
55  
56  
57  
58  
59  
60

## Implications

The number of people surviving TBIs is increasing. While the neurological consequences of TBI are well described, evidence is emerging on associations between brain injury, comorbid disorders and adverse short and long-term outcomes post-injury.<sup>36,37</sup> The significant economic and human costs of TBIs merit the call for systematic efforts to understand all factors that contribute to adverse post-injury outcomes, including comorbidity,<sup>38</sup> all with the goal to allow better risk stratification to guide management of brain injury acutely and at the chronic stages post injury on a population level.

## Funding sources

The study was funded by the National Institutes of Health (NIH) under Award 1R21 HD08106-01 (PI: Dr. Angela Colantonio). AC is supported by the Canadian Institutes for Health Research Grant–Institute for Gender and Health (#CGW-126580). TM is supported by the postdoctoral research grant Alzheimer’s Association (AARF-16-442937). The funders had no role in study design, data collection, decision to publish, or preparation of the manuscript.

## Competing interests

The authors have no conflict of interest to declare pertaining to this review.

## Authors' contributions

Protocol concept and design: Tatyana Mollayeva, Angela Colantonio. Registry PROSPERO: Chen Xiong. Acquisition of data: Tatyana Mollayeva. Administrative, technical, and material support: Chen Xiong, Sara Hanafy. Statistical analysis approach: Vincy Chan, Zheng Jing Hu, Mitchell Sutton, Michael Escobar. Drafting of the manuscript: Tatyana Mollayeva. Critical revision of the manuscript for important intellectual content: All authors.

## Human and Animal Rights and Informed Consent



1  
2  
3 This article does not contain any studies with human or animal subjects performed by any of the  
4  
5 authors.  
6  
7

### 8 **Acknowledgments**

9  
10 We gratefully acknowledge the involvement of Ms. Jessica Babineau, Information Specialist at  
11  
12 the Toronto Rehabilitation Institute- University Health Network for her comprehensive literature  
13  
14 search.  
15  
16  
17  
18  
19  
20  
21  
22

### 23 **Additional material**

24  
25  
26  
27 File name: Supplementary TableS1.Search details  
28

29  
30 File format: Table S1\_10072017.pdf  
31  
32

33  
34 Title of data: Search strategies.  
35  
36

37  
38 Description of data: This file provides the list of search terms used to  
39  
40 search Medline, Central, Embase, Scopus, PsycINFO, and supplemental  
41  
42 PubMed.  
43  
44  
45  
46  
47  
48  
49  
50  
51  
52  
53  
54  
55  
56  
57  
58  
59  
60

## References

1. Brain Injury Association of America. About Brain Injury. Retrieved June 12, 2017, from <http://www.biausa.org/about-brain-injury.htm>.
2. World Health Organization. 2006. Projections of Mortality and Burden of Disease, 2002–2030. Deaths by Income Group. [Computer file] Retrieved June 12, 2017, from [http://www.who.int/healthinfo/global\\_burden\\_disease/projections2002/en/](http://www.who.int/healthinfo/global_burden_disease/projections2002/en/).
3. Coronado VG, McGuire LC, Sarmiento K, Bell J, Lionbarger MR, Jones CD, Geller AI, Khoury N, Xu L. Trends in Traumatic Brain Injury in the U.S. and the public health response: 1995-2009. *J Safety Res.* 2012;43(4):299-307.
4. Public Health Agency of Canada. 2014. Mapping Connections: An Understanding of Neurological Conditions in Canada. Ottawa, ON: Public Health Agency of Canada. Retrieved June 12, 2017, from <http://www.phac-aspc.gc.ca/publicat/cd-mc/mc-ec/assets/pdf/mc-ec-eng.pdf>.
5. Colantonio A, Saverino C, Zagorski B, Swaine B, Lewko J, Jaglal S et al. Hospitalizations and Emergency Department Visits for TBI in Ontario. *Can J Neurol Sci.* 2010; 37(6): 783–90.
6. Feinstein AR. The pre-therapeutic classification of co-morbidity in chronic disease. *J Chron Disease.* 1970; 23: 455–68.
7. Chan V, Mollayeva T, Ottenbacher KJ, Colantonio A. Clinical profile and comorbidity of traumatic brain injury among younger and older men and women: a brief research notes. *BMC Res Notes.* 2017;10(1):371.

- 1  
2  
3 8. Brooks JC, Shavelle RM, Strauss DJ, Hammond FM, Harrison-Felix CL. Long-Term  
4 Survival After Traumatic Brain Injury Part II: Life Expectancy. *Arch Phys Med Rehabil.*  
5  
6 2015; 96(6):1000-5.  
7
- 8  
9  
10 9. Fu TS, Jing R, McFaull SR, Cusimano MD. Recent trends in hospitalization and in-  
11 hospital mortality associated with traumatic brain injury in Canada: A nationwide,  
12  
13 population-based study. *J Trauma Acute Care Surg.* 2015; 79(3 Suppl 1):449-55.  
14  
15
- 16  
17 10. Popescu C, Anghelescu A, Daia C, Onose G. Actual data on epidemiological evolution  
18 and prevention endeavours regarding traumatic brain injury. *J Med Life.* 2015;8(3):272-7.  
19  
20
- 21 11. Valderas JM, Starfiels B, Sibbald B, Salisbury C, Roland M. Defining comorbidity:  
22 implications for understanding health and health services. *Ann Fam Med.* 2009; 7:357-63.  
23  
24
- 25 12. Gardizi E, Hanks RA, Millis SR, Figueroa MJ. Comorbidity and insurance as predictors  
26 of disability following traumatic brain injury. *Arch Phys Med Rehabil.* 2014; 95:2396–  
27 401.  
28  
29
- 30 13. Coronado VG, Thomas KE, Sattin RW, Johnson RL. The CDC traumatic brain injury  
31 surveillance system: Characteristics of persons aged 65 years and older hospitalized with  
32 a TBI. *J Head Trauma Rehabil.* 2005; 20(3): 215–28.  
33  
34
- 35 14. Colantonio A, Gerber G, Bayley M, Deber R, Yin J, Kim H. Differential profiles for  
36 patients with traumatic and non-traumatic brain injury. *J Rehabil Med.* 2011; 43(4): 311–  
37 15  
38  
39
- 40 15. Thompson HJ, Dikmen S, Temkin N. Prevalence of comorbidity and its association with  
41 traumatic brain injury and outcomes in older adults. *Res Gerontol Nurs.* 2012; 5(1): 17–  
42 24  
43  
44  
45  
46  
47  
48  
49  
50  
51  
52  
53  
54  
55  
56  
57  
58  
59  
60

- 1  
2  
3  
4  
5  
6  
7  
8  
9  
10  
11  
12  
13  
14  
15  
16  
17  
18  
19  
20  
21  
22  
23  
24  
25  
26  
27  
28  
29  
30  
31  
32  
33  
34  
35  
36  
37  
38  
39  
40  
41  
42  
43  
44  
45  
46  
47  
48  
49  
50  
51  
52  
53  
54  
55  
56  
57  
58  
59  
60
16. Gardizi E, Hanks RA, Millis SR, Figueroa MJ. Comorbidity and insurance as predictors of disability following traumatic brain injury. *Arch Phys Med Rehabil.* 2014; 95(12): 2396–01.
  17. Kumar RG, Juengst SB, Wang Z, Dams-O'Connor K, Dikmen SS, O'Neil-Pirozzi TM, Dahdah MN, Hammond FM, Felix ER, Arenth PM, Wagner AK. Epidemiology of Comorbid Conditions Among Adults 50 Years and Older With Traumatic Brain Injury. *J Head Trauma Rehabil.* 2017 [Epub ahead of print] doi: 10.1097/HTR.0000000000000273.
  18. Fu TS, Jing R, McFaull SR, Cusimano MD. Recent trends in hospitalization and in-hospital mortality associated with traumatic brain injury in Canada: A nationwide, population-based study. *J Trauma Acute Care Surg.* 2015; 79(3):449-54.
  19. Ventura T, Harrison-Felix C, Carlson N, Diguseppi C, Gabella B, Brown A, Devivo M, Whiteneck G. Mortality after discharge from acute care hospitalization with traumatic brain injury: a population-based study. *Arch Phys Med Rehabil.* 2010;91(1):20-9.
  20. Hodgkinson A, Veerabangsa A, Drane D, McCluskey A. Service utilization following traumatic brain injury. *J Head Trauma Rehabil.* 2000;15(6):1208-26.
  21. Perrin PB, Niemeier JP, Mougeot JL, Vannoy CH, Hirsch MA, Watts JA, Rossman W, Grafton LM, Guerrier TD, Pershad R, Kingsbury CA, Bartel SW, Whitney MP. Measures of injury severity and prediction of acute traumatic brain injury outcomes. *J Head Trauma Rehabil.* 2015; 30(2):136-42.
  22. Krasny-Pacini A, Chevignard M, Lancien S, Escolano S, Laurent-Vannier A, De Agostini M, Meyer P. Executive function after severe childhood traumatic brain injury - Age-at-

- 1  
2  
3 injury vulnerability periods: The TGE prospective longitudinal study. *Ann Phys Rehabil*  
4  
5 *Med.* 2017;60(2):74-82.  
6  
7
- 8 23. Klauber MR, Marshall LF, Barrett-Connor E, et al: Prospective study of patients  
9  
10 hospitalized with head injury in San Diego County, 1978. *Neurosurgery.* 1981; 9:236–41.  
11
- 12 24. Slewa-Younan S, van den Berg S, Baguley IJ, Nott M, Cameron ID. Towards an  
13  
14 understanding of sex differences in functional outcome following moderate to severe  
15  
16 traumatic brain injury: a systematic review. *J Neurol Neurosurg Psychiatry.*  
17  
18 2008;79(11):1197-201.  
19
- 20 25. Moher D, Liberati A, Tetzlaff J, Altman DG. Preferred reporting items for systematic  
21  
22 reviews and meta-analyses for PRISMA statement. *PLoS Medicine.* 2009; 6(7).  
23  
24
- 25 26. PROSPERO- International Prospective Register of Systematic Reviews.  
26  
27 [http://www.crd.york.ac.uk/prospero/].  
28  
29
- 30 27. Valderas JM, Starfiels B, Sibbald B, Salisbury C, Roland M. Defining comorbidity:  
31  
32 implications for understanding health and health services. *Ann Fam Med.* 2009; 7:357-  
33  
34 363.  
35  
36
- 37 28. Canadian Coding Standards for Version 2015 ICD-10-CA and CCI, assessed August 25,  
38  
39 2017 at: [https://secure.cihi.ca/free\\_products/Coding%20standard\\_EN\\_web.pdf](https://secure.cihi.ca/free_products/Coding%20standard_EN_web.pdf)  
40  
41
- 42 29. Mollayeva T, Kendzerska T, Mollayeva S, Shapiro CM, Colantonio A, Cassidy JD. A  
43  
44 systematic review of fatigue in patients with traumatic brain injury: the course, predictors  
45  
46 and consequences. *Neurosci Biobehav Rev.* 2014;47: 684-716.  
47  
48
- 49 30. Hayden JA, Cote P, Bombardier C. Evaluation of the quality of prognosis studies in  
50  
51 systematic reviews. *Ann Intern Med.* 2006; 144: 427-37.  
52  
53  
54  
55  
56  
57  
58  
59  
60

- 1  
2  
3  
4  
5  
6  
7  
8  
9  
10  
11  
12  
13  
14  
15  
16  
17  
18  
19  
20  
21  
22  
23  
24  
25  
26  
27  
28  
29  
30  
31  
32  
33  
34  
35  
36  
37  
38  
39  
40  
41  
42  
43  
44  
45  
46  
47  
48  
49  
50  
51  
52  
53  
54  
55  
56  
57  
58  
59  
60
31. Scottish Intercollegiate Guidelines Network: Published Guidelines. Retrieved 03 09 2017 from <http://www.sign.ac.uk.guidelines/>
  32. Terrin N, Schmid CH, Lau J. In an empirical evaluation of the funnel plot, researchers could not visually identify publication bias. *J Clin Epidemiol*. 2005; 58(9):894-901.
  33. Mavridis D, Salanti G. Exploring and accounting for publication bias in mental health: a brief overview of methods. *Evid Based Ment Health*. 2014; 17(1):11-5.
  34. Slavin RE. (1995) Best evidence synthesis: an intelligent alternative to meta-analysis. *J Clin Epidemiol*, 48: 9–18.
  35. Hartling L, Featherstone R, Nuspl M, Shave K, Dryden DM, Vandermeer B. Grey literature in systematic reviews: a cross-sectional study of the contribution of non-English reports, unpublished studies and dissertations to the results of meta-analyses in child-relevant reviews. Reference: *BMC Med Res Methodol*. 2017;17(1):64.
  36. Shukla D, Devi BI, Agrawal A. Outcome measures for traumatic brain injury. *Clin Neurol Neurosurg*. 2011; 113(6):435-41.
  37. Nichol AD, Higgins AM, Gabbe BJ, Murray LJ, Cooper DJ, Cameron PA. Measuring functional and quality of life outcomes following major head injury: common scales and checklists. *Injury*. 2011;42(3):281-7.
  38. Charlson ME, Pompei P, Ales KL, MacKenzie CR. A new method of classifying prognostic comorbidity in longitudinal studies: development and validation. *J Chronic Dis*. 1987;40(5):373-83.

**Supplementary Table S1.** Search details.

Searches conducted in Medline (including Medline in Process and other non-indexed citations, ePubs and Medline Daily), Embase, Cochrane Central Register of Controlled Trials, and PsycINFO. Searches were limited from 1997 to May 2017. Searches were limited to English language papers, and to an adult, human population when possible. Searches were conducted by an Information Specialist (JB).

**PRE-DUPLICATE REMOVAL**

*TOTAL Results: 9414*

Medline: 2860

Central: 178

Embase: 5468

PsycINFO: 908

**POST-DUPLICATE REMOVAL**

*TOTAL Results: 7443*

*Duplicates removed: 1971*

Medline: 2748

Central: 116

Embase: 4088

PsycINFO: 491

Database: Ovid MEDLINE(R) Epub Ahead of Print, In-Process & Other Non-Indexed Citations, Ovid MEDLINE(R) Daily and Ovid MEDLINE(R) <1946 to Present>  
Search Strategy:

- 
- 1 exp brain injuries/ (59169)
  - 2 Craniocerebral Trauma/ (21199)
  - 3 exp Head Injuries, Closed/ (9232)
  - 4 exp Skull Fractures/ (20700)
  - 5 mTBI\*2.tw,kw. (1835)
  - 6 tbi\*2.tw,kw. (20636)
  - 7 concuss\*.tw,kw. (6496)
  - 8 ((head\* or cerebr\* or crani\* or skull\* or intracran\*) adj2 (injur\* or trauma\* or damag\* or wound\* or swell\* or oedema\* or edema\* or fracture\* or contusion\* or pressur\*).tw,kw. (75791)
  - 9 ((brain\* or cerebr\* or intracerebr\* or crani\* or intracran\* or head\* or subdural\* or epidural\* or extradural\*) adj (haematoma\* or hematoma\* or hemorrhag\* or haemorrhag\* or bleed\*).tw,kw. (42638)
  - 10 or/1-9 (185742)
  - 11 exp Comorbidity/ (88810)
  - 12 exp Risk Adjustment/ (2770)
  - 13 (comorbid\* or co morbid\* or multimorbid\* or multi morbid\*).tw,kw. (131913)
  - 14 (polypatholog\* or poly-patholog\*).tw,kw. (151)
  - 15 ((clinical\* or medical\*) adj3 complex\*).tw,kw. (11314)

- 16 ((coexist\* or co exist\* or cooccur\* or co-occur\* or multipl\*) adj3 (illness\* or disease\* or disorder\* or condition\* or complication\* or diagnos\* or risk\*)).tw,kw. (69114)
- 17 (multidisease? or multi-disease? or (multiple adj (ill\* or disease? or condition? or syndrom\* or disorder?))),tw,kw. (3721)
- 18 ((several\* or various or (two adj2 more) or concomitant or conjoined or concurrent) adj3 (morbid\* or ill\* or disease\* or sick\* or condition\*)).tw,kw. (129147)
- 19 "comorbidity-polypharmacy score".tw,kw. (11)
- 20 ('charlson comorbidity index' or 'CCI' or 'CMI' or elixhauser or 'BOD index' or 'cumulative index rating scale' or 'CIRS' or 'Coroni-Huntley index' or 'DUSOI index' or 'Hallstrom index' or 'Hurwitz index' or 'Incalzi index', 'Kaplan index', 'Liu index', 'Shwartz index' or 'comorbidity-polypharmacy score').tw,kw. (10394)
- 21 or/11-20 (394772)
- 22 10 and 21 (5122)
- 23 exp Mortality/ (335478)
- 24 exp morbidity/ (467773)
- 25 (morbidit\* or mortalit\*).tw,kw. (760891)
- 26 function\*.mp. (3282516)
- 27 or/23-26 (4495784)
- 28 exp cohort studies/ (1680971)
- 29 exp prognosis/ (1379668)
- 30 exp survival analysis/ (241795)
- 31 exp models, statistical/ (344993)
- 32 prognos\*.tw,kw. (492733)
- 33 predict\*.tw,kw. (1261259)
- 34 course\*.tw,kw. (546731)
- 35 diagnosed.tw,kw. (461120)
- 36 cohort\*.tw,kw. (423751)
- 37 death.tw,kw. (584394)
- 38 exp treatment outcome/ (841041)
- 39 "early termination of clinical trials"/ (544)
- 40 treatment failure/ (31446)
- 41 incidence/ (222806)
- 42 or/28-41 (5055925)
- 43 27 or 42 (8021818)
- 44 22 and 43 (3756)
- 45 44 not (exp animals/ not exp humans/) (3301)
- 46 45 not (exp children/ not exp adults/) (3118)
- 47 limit 46 to english language (2860)
- 48 remove duplicates from 47 (2750)**

\*\*\*\*\*

Database: Embase <1974 to 2017 May 10>

Search Strategy:

-----  
1 exp brain injury/ (148571)



1  
2  
3  
4 2 head injury/ (44023)  
5 3 mTBI\*2.tw. (2763)  
6 4 tbi\*2.tw. (32342)  
7 5 concuss\*.tw. (7543)  
8 6 ((head\* or cerebr\* or crani\* or skull\* or intracran\*) adj2 (injur\* or trauma\* or  
9 damag\* or wound\* or swell\* or oedema\* or edema\* or fracture\* or contusion\* or  
10 pressur\*)),tw,kw. (96428)  
11 7 ((brain\* or cerebr\* or intracerebr\* or crani\* or intracran\* or head\* or subdural\* or  
12 epidural\* or extradural\*) adj (haematoma\* or hematoma\* or hemorrhag\* or haemorrhag\*  
13 or bleed\*)),tw,kw. (59251)  
14 8 or/1-7 (291625)  
15 9 comorbidity/ (177225)  
16 10 risk assessment/ (409214)  
17 11 exp comorbidity assessment/ (9540)  
18 12 (comorbid\* or co morbid\* or multimorbid\* or multi morbid\*).tw,kw. (217271)  
19 13 (polypatholog\* or poly-patholog\*).tw,kw. (290)  
20 14 ((clinical\* or medical\*) adj3 complex\*).tw,kw. (15500)  
21 15 ((coexist\* or co exist\* or cooccur\* or co-occur\* or multipl\*) adj3 (illness\* or  
22 disease\* or disorder\* or condition\* or complication\* or diagnos\* or risk\*)),tw,kw.  
23 (94039)  
24 16 (multidisease? or multi-disease? or (multiple adj (ill\* or disease? or condition? or  
25 syndrom\* or disorder?))),tw,kw. (4710)  
26 17 ((several\* or various or (two adj2 more) or concomitant or conjoined or concurrent)  
27 adj3 (morbid\* or ill\* or disease\* or sick\* or condition\*)),tw,kw. (163497)  
28 18 "comorbidity-polypharmacy score".tw,kw. (15)  
29 19 ('charlson comorbidity index' or 'CCI' or 'CMI' or elixhauser or 'BOD index' or  
30 'cumulative index rating scale' or 'CIRS' or 'Coroni-Huntley index' or 'DUSOI index' or  
31 'Hallstrom index' or 'Hurwitz index' or 'Incalzi index', 'Kaplan index', 'Liu index',  
32 'Shwartz index' or 'comorbidity-polypharmacy score').tw,kw. (19018)  
33 20 or/9-19 (943533)  
34 21 8 and 20 (15388)  
35 22 exp mortality/ (858109)  
36 23 exp morbidity/ (299827)  
37 24 (morbidit\* or mortalit\*).tw,kw. (1038507)  
38 25 function\*.mp. (4279406)  
39 26 or/22-25 (5472712)  
40 27 cohort analysis/ (287239)  
41 28 prognosis/ (506894)  
42 29 survival analysis/ (3712)  
43 30 exp survival/ (845725)  
44 31 statistical model/ (136685)  
45 32 exp "prediction and forecasting"/ (1010760)  
46 33 prognos\*.tw,kw. (700803)  
47 34 predict\*.tw,kw. (1580756)  
48 35 course\*.tw,kw. (702204)  
49 36 diagnosed.tw,kw. (688998)  
50  
51  
52  
53  
54  
55  
56  
57  
58  
59  
60

37 cohort\*.tw,kw. (649460)  
 38 death.tw,kw. (778611)  
 39 exp treatment outcome/ (1236966)  
 40 "early termination of clinical trial"/ (204)  
 41 exp treatment failure/ (108708)  
 42 exp incidence/ (330423)  
 43 or/27-42 (5901375)  
 44 26 or 43 (9681606)  
 45 21 and 44 (10931)  
 46 45 not ((exp animals/ or exp animal experimentation/ or nonhuman/) not exp  
 human/) (9877)  
 47 46 not ((exp embryo/ or exp fetus/ or exp juvenile/) not exp adult/) (8968)  
 48 limit 47 to english language (8463)  
 49 limit 48 to embase (5871)  
 50 limit 49 to (conference abstract or conference paper or "conference review") (179)  
 51 49 not 50 (5692)  
 52 **limit 51 to yr="1997 -Current" (5468)**

\*\*\*\*\*

Database: EBM Reviews - Cochrane Central Register of Controlled Trials <April 2017>  
 Search Strategy:

-----

1 exp brain injuries/ (1135)  
 2 Craniocerebral Trauma/ (247)  
 3 exp Head Injuries, Closed/ (167)  
 4 exp Skull Fractures/ (192)  
 5 mTBI\*2.tw,kw. (122)  
 6 tbi\*2.tw,kw. (1306)  
 7 concuss\*.tw,kw. (221)  
 8 ((head\* or cerebr\* or crani\* or skull\* or intracran\*) adj2 (injur\* or trauma\* or  
 damag\* or wound\* or swell\* or oedema\* or edema\* or fracture\* or contusion\* or  
 pressur\*)),tw,kw. (3278)  
 9 ((brain\* or cerebr\* or intracerebr\* or crani\* or intracran\* or head\* or subdural\* or  
 epidural\* or extradural\*) adj (haematoma\* or hematoma\* or hemorrhag\* or haemorrhag\*  
 or bleed\*)),tw,kw. (3605)  
 10 or/1-9 (8539)  
 11 exp Comorbidity/ (3012)  
 12 exp Risk Adjustment/ (20)  
 13 (comorbid\* or co morbid\* or multimorbid\* or multi morbid\*).tw,kw. (9750)  
 14 (polypatholog\* or poly-patholog\*).tw,kw. (4)  
 15 ((clinical\* or medical\*) adj3 complex\*).tw,kw. (711)  
 16 ((coexist\* or co exist\* or cooccur\* or co-occur\* or multipl\*) adj3 (illness\* or  
 disease\* or disorder\* or condition\* or complication\* or diagnos\* or risk\*)),tw,kw. (4140)  
 17 (multidisease? or multi-disease? or (multiple adj (ill\* or disease? or condition? or  
 syndrom\* or disorder?))),tw,kw. (107)

- 1  
2  
3 18 ((several\* or various or (two adj2 more) or concomitant or conjoined or concurrent)  
4 adj3 (morbid\* or ill\* or disease\* or sick\* or condition\*)).tw,kw. (1145)  
5  
6 19 "comorbidity-polypharmacy score".tw,kw. (0)  
7  
8 20 ('charlson comorbidity index' or 'CCI' or 'CMI' or elixhauser or 'BOD index' or  
9 'cumulative index rating scale' or 'CIRS' or 'Coroni-Huntley index' or 'DUSOI index' or  
10 'Hallstrom index' or 'Hurwitz index' or 'Incalzi index', 'Kaplan index', 'Liu index',  
11 'Shwartz index' or 'comorbidity-polypharmacy score').tw,kw. (748)  
12  
13 21 or/11-20 (17592)  
14  
15 22 10 and 21 (214)  
16  
17 23 22 not (exp animals/ not exp humans/) (214)  
18  
19 24 23 not (exp Child/ not exp Adult/) (213)  
20  
21 25 limit 24 to english language (185)  
22  
23 **26 limit 25 to yr="1997 -Current" (178)**

24 \*\*\*\*\*

25 Database: PsycINFO <1806 to May Week 1 2017>

26 Search Strategy:

- 27 -----  
28  
29 1 exp traumatic brain injury/ (15677)  
30  
31 2 exp head injuries/ (5584)  
32  
33 3 mTBI\*2.tw. (1312)  
34  
35 4 tbi\*2.tw. (8651)  
36  
37 5 concuss\*.tw. (2360)  
38  
39 6 ((head\* or cerebr\* or crani\* or skull\* or intracran\*) adj2 (injur\* or trauma\* or  
40 damag\* or wound\* or swell\* or oedema\* or edema\* or fracture\* or contusion\* or  
41 pressur\*)).tw. (11318)  
42  
43 7 ((brain\* or cerebr\* or intracerebr\* or crani\* or intracran\* or head\* or subdural\* or  
44 epidural\* or extradural\*) adj (haematoma\* or hematoma\* or hemorrhag\* or haemorrhag\*  
45 or bleed\*)).tw. (3029)  
46  
47 8 or/1-7 (28382)  
48  
49 9 comorbidity/ (27127)  
50  
51 10 risk assessment/ (11895)  
52  
53 11 (comorbid\* or co morbid\* or multimorbid\* or multi morbid\*).tw. (49497)  
54  
55 12 (polypatholog\* or poly-patholog\*).tw. (23)  
56  
57 13 ((clinical\* or medical\*) adj3 complex\*).tw. (2577)  
58  
59 14 ((coexist\* or co exist\* or cooccur\* or co-occur\* or multipl\*) adj3 (illness\* or  
60 disease\* or disorder\* or condition\* or complication\* or diagnos\* or risk\*)).tw. (16826)  
15 (multidisease? or multi-disease? or (multiple adj (ill\* or disease? or condition? or  
syndrom\* or disorder?))).tw. (666)  
16 ((several\* or various or (two adj2 more) or concomitant or conjoined or concurrent)  
adj3 (morbid\* or ill\* or disease\* or sick\* or condition\*)).tw. (14708)  
17 "comorbidity-polypharmacy score".tw. (2)  
18 ('charlson comorbidity index' or 'CCI' or 'CMI' or elixhauser or 'BOD index' or  
'cumulative index rating scale' or 'CIRS' or 'Coroni-Huntley index' or 'DUSOI index' or

1  
2  
3 'Hallstrom index' or 'Hurwitz index' or 'Incalzi index', 'Kaplan index', 'Liu index',  
4 'Shwartz index' or 'comorbidity-polypharmacy score').tw,tm. (2701)  
5  
6 19 or/9-18 (97253)  
7  
8 20 8 and 19 (1354)  
9  
10 21 limit 20 to animal (317)  
11  
12 22 limit 20 to human (1042)  
13  
14 23 20 not (21 not 22) (1071)  
15  
16 24 limit 23 to ((childhood <birth to 12 years> or adolescence <13 to 17 years>) and  
17 (100 childhood <birth to age 12 yrs> or 120 neonatal <birth to age 1 mo> or 140 infancy  
18 <2 to 23 mo> or 160 preschool age <age 2 to 5 yrs> or 180 school age <age 6 to 12 yrs>  
19 or 200 adolescence <age 13 to 17 yrs>)) (132)  
20  
21 25 limit 23 to (adulthood <18+ years> and ("300 adulthood <age 18 yrs and older>" or  
22 320 young adulthood <age 18 to 29 yrs> or 340 thirties <age 30 to 39 yrs> or 360 middle  
23 age <age 40 to 64 yrs> or "380 aged <age 65 yrs and older>" or "390 very old <age  
24 85 yrs and older>")) (589)  
25  
26 26 23 not (24 not 25) (1023)  
27  
28 27 limit 26 to english language (977)  
29  
30  
31  
32  
33  
34  
35  
36  
37  
38  
39  
40  
41  
42  
43  
44  
45  
46  
47  
48  
49  
50  
51  
52  
53  
54  
55  
56  
57  
58  
59  
60

**28 limit 27 to yr="1997 -Current" (908)**

\*\*\*\*\*

**PRISMA-P (Preferred Reporting Items for Systematic review and Meta-Analysis Protocols) 2015 checklist: recommended items to address in a systematic review protocol\***

| Section and topic                 | Item No | Checklist item                                                                                                                                                                                  | Location; page(s) within the manuscript |
|-----------------------------------|---------|-------------------------------------------------------------------------------------------------------------------------------------------------------------------------------------------------|-----------------------------------------|
| <b>ADMINISTRATIVE INFORMATION</b> |         |                                                                                                                                                                                                 |                                         |
| Title:                            |         |                                                                                                                                                                                                 |                                         |
| Identification                    | 1a      | Identify the report as a protocol of a systematic review                                                                                                                                        | Title, abstract, manuscript; pgs. 1-18  |
| Update                            | 1b      | If the protocol is for an update of a previous systematic review, identify as such                                                                                                              | NA; original review protocol            |
| Registration                      | 2       | If registered, provide the name of the registry (such as PROSPERO) and registration number                                                                                                      | PROSPERO: CRD42017070033                |
| Authors:                          |         |                                                                                                                                                                                                 |                                         |
| Contact                           | 3a      | Provide name, institutional affiliation, e-mail address of all protocol authors; provide physical mailing address of corresponding author                                                       | Title page: 1-2                         |
| Contributions                     | 3b      | Describe contributions of protocol authors and identify the guarantor of the review                                                                                                             | Pgs.20                                  |
| Amendments                        | 4       | If the protocol represents an amendment of a previously completed or published protocol, identify as such and list changes; otherwise, state plan for documenting important protocol amendments | N/A                                     |
| Support:                          |         |                                                                                                                                                                                                 |                                         |
| Sources                           | 5a      | Indicate sources of financial or other support for the review                                                                                                                                   | Pg. 20                                  |
| Sponsor                           | 5b      | Provide name for the review funder and/or sponsor                                                                                                                                               | Pg. 20                                  |
| Role of sponsor or funder         | 5c      | Describe roles of funder(s), sponsor(s), and/or institution(s), if any, in developing the protocol                                                                                              | Pg. 20                                  |
| <b>INTRODUCTION</b>               |         |                                                                                                                                                                                                 |                                         |
| Rationale                         | 6       | Describe the rationale for the review in the context of what is already known                                                                                                                   | Pgs. 8-9                                |
| Objectives                        | 7       | Provide an explicit statement of the question(s) the review will address with reference to participants, interventions, comparators, and outcomes (PICO)                                        | Pg. 9                                   |
| <b>METHODS</b>                    |         |                                                                                                                                                                                                 |                                         |

|                                    |     |                                                                                                                                                                                                                                                  |                             |
|------------------------------------|-----|--------------------------------------------------------------------------------------------------------------------------------------------------------------------------------------------------------------------------------------------------|-----------------------------|
| Eligibility criteria               | 8   | Specify the study characteristics (such as PICO, study design, setting, time frame) and report characteristics (such as years considered, language, publication status) to be used as criteria for eligibility for the review                    | Pg. 11, pg. 14              |
| Information sources                | 9   | Describe all intended information sources (such as electronic databases, contact with study authors, trial registers or other grey literature sources) with planned dates of coverage                                                            | Pg. 10                      |
| Search strategy                    | 10  | Present draft of search strategy to be used for at least one electronic database, including planned limits, such that it could be repeated                                                                                                       | Supplementary file Table S1 |
| Study records:                     |     |                                                                                                                                                                                                                                                  |                             |
| Data management                    | 11a | Describe the mechanism(s) that will be used to manage records and data throughout the review                                                                                                                                                     | Pg. 14-15                   |
| Selection process                  | 11b | State the process that will be used for selecting studies (such as two independent reviewers) through each phase of the review (that is, screening, eligibility and inclusion in meta-analysis)                                                  | Pg. 14                      |
| Data collection process            | 11c | Describe planned method of extracting data from reports (such as piloting forms, done independently, in duplicate), any processes for obtaining and confirming data from investigators                                                           | Pg. 14-16                   |
| Data items                         | 12  | List and define all variables for which data will be sought (such as PICO items, funding sources), any pre-planned data assumptions and simplifications                                                                                          | Pgs.14-17                   |
| Outcomes and prioritization        | 13  | List and define all outcomes for which data will be sought, including prioritization of main and additional outcomes, with rationale                                                                                                             | Pg. 13-14                   |
| Risk of bias in individual studies | 14  | Describe anticipated methods for assessing risk of bias of individual studies, including whether this will be done at the outcome or study level, or both; state how this information will be used in data synthesis                             | Pgs.15-16                   |
| Data synthesis                     | 15a | Describe criteria under which study data will be quantitatively synthesised                                                                                                                                                                      | Pg. 17                      |
|                                    | 15b | If data are appropriate for quantitative synthesis, describe planned summary measures, methods of handling data and methods of combining data from studies, including any planned exploration of consistency (such as $I^2$ , Kendall's $\tau$ ) | Pg. 17                      |
|                                    | 15c | Describe any proposed additional analyses (such as sensitivity or subgroup analyses, meta-regression)                                                                                                                                            | Pg. 17                      |
|                                    | 15d | If quantitative synthesis is not appropriate, describe the type of summary planned                                                                                                                                                               | Pg.18                       |

1  
2  
3  
4  
5  
6  
7  
8  
9  
10  
11  
12  
13  
14  
15  
16  
17  
18  
19  
20  
21  
22  
23  
24  
25  
26  
27  
28  
29  
30  
31  
32  
33  
34  
35  
36  
37  
38  
39  
40  
41  
42  
43  
44  
45  
46  
47  
48  
49

|                                   |    |                                                                                                                               |           |
|-----------------------------------|----|-------------------------------------------------------------------------------------------------------------------------------|-----------|
| Meta-bias(es)                     | 16 | Specify any planned assessment of meta-bias(es) (such as publication bias across studies, selective reporting within studies) | Pg.16     |
| Confidence in cumulative evidence | 17 | Describe how the strength of the body of evidence will be assessed (such as GRADE)                                            | Pg. 15-16 |

**\* It is strongly recommended that this checklist be read in conjunction with the PRISMA-P Explanation and Elaboration (cite when available) for important clarification on the items. Amendments to a review protocol should be tracked and dated. The copyright for PRISMA-P (including checklist) is held by the PRISMA-P Group and is distributed under a Creative Commons Attribution Licence 4.0.**

*From: Shamseer L, Moher D, Clarke M, Ghersi D, Liberati A, Petticrew M, Shekelle P, Stewart L, PRISMA-P Group. Preferred reporting items for systematic review and meta-analysis protocols (PRISMA-P) 2015: elaboration and explanation. BMJ. 2015 Jan 2;349(jan02 1):g7647.*
